# Supplementary material for: Effects of probiotic supplements on growth performance and intestinal microbiota of partridge shank broiler chicks
Source: PeerJ. 2021 Dec 1;9:e12538. doi: 10.7717/peerj.12538 (PMC8643103; doi:10.7717/peerj.12538)
Supplement: Supplemental Information 7 [file peerj-09-12538-s007.xlsx]

## Sheet: Sheet1
Table S3. The phylum-level Abundances of intestinal flora between EM-treated and control group
Phylum	B0	EM0	B10	EM10	B20	EM20	B20C	EM20C
Firmicutes	0.905325	0.926285	0.905611	0.878084	0.632425	0.755785	0.911434	0.752907
Proteobacteria	0.0607687	0.0137322	0.0213629	0.085296	0.23938	0.124406	0.00621571	0.00733295
Bacteroidetes	0.015841	0.0447471	0.0354605	0.00797921	0.0785241	0.060904	0.0272223	0.0171971
Tenericutes	0.0128068	0.00293341	0.00345625	0.00147444	0.00382075	0.000804195	0.00847061	0.00571976
Cyanobacteria	0.00399099	0.010462	0.0218531	0.016783	0.0050396	0.00284758	0.0106187	0.0176527
Unassigned	0.000568399	0.000986003	0.000768612	0.00040081	0.00698168	0.0232883	0.00516656	0.00243458
Actinobacteria	0.000563799	0.000757802	0.00280244	0.00228206	0.0076091	0.00472917	0.00820302	0.136927
Lentisphaerae	6.09999e-05	4.60001e-06	3.00005e-05	1.06003e-05	0.000230209	0.000103399	9.75955e-05	6.15995e-05
Fusobacteria	3.73999e-05	6.00002e-06	0.000138002	0.000222206	6.44026e-05	0.00601596	0.000102395	1.13999e-05
[Thermi]	3.29999e-05	1.32e-05	3.54005e-05	0.000169404	0.000114205	0.000101199	2.99986e-06	1.11999e-05
Euryarchaeota	2.79999e-06	1.4e-06	0.00508988	0.00423791	0.00195908	0.00316558	0.00953736	0.00348357
Verrucomicrobia	1.4e-06	1.54e-05	0.000222003	0.000152604	0.0073997	0.00265738	0.00282827	0.0308822
Acidobacteria	0	0	0	0	0	1.31999e-05	0	0
Chloroflexi	0	0	9.60015e-06	0	0	0	0	0
Deferribacteres	0	0	6.7001e-05	0.000143204	0.000324413	0.000280598	0.000752565	0.000430197
Elusimicrobia	0	0	0.00068581	1.64004e-05	0.000205208	0.00153279	1.59993e-06	0.000428597
Spirochaetes	0	0	1.14002e-05	3.22008e-05	0.00148626	8.27995e-05	0.000153193	0.000304798
Synergistetes	0	5.56002e-05	0.00137002	0.00039081	0.0122711	0.00905695	0.00531056	0.0159473
TM7	0	0	0.00102602	0.00119783	0.00192528	0.000233199	0.00387942	0.000842794
WPS-2	0	0	0	0.00112743	0.00023981	0.00399318	2.99986e-06	0.00742555
