# Supplementary material for: Effects of probiotic supplements on growth performance and intestinal microbiota of partridge shank broiler chicks
Source: PeerJ. 2021 Dec 1;9:e12538. doi: 10.7717/peerj.12538 (PMC8643103; doi:10.7717/peerj.12538)
Supplement: Supplemental Information 8 [file peerj-09-12538-s008.xlsx]

## Sheet: Sheet1
Table S4 The genus-level abundance table of intestinal flora between EM-treated and control groups
Genus	B0	EM0	B10	EM10	B20	EM20	B20C	EM20C
k__Bacteria;p__Firmicutes;c__Bacilli;o__Lactobacillales;f__Lactobacillaceae;g__Lactobacillus	0.747633	0.780281	0.509112	0.468996	0.332629	0.485029	0.017875	0.0253862
k__Bacteria;p__Firmicutes;c__Clostridia;o__Clostridiales;f__Ruminococcaceae;g__Faecalibacterium	0.0272555	0.0126894	0.00261724	0.00206045	0.00404396	0.00344358	0.00332825	0.00556616
k__Bacteria;p__Firmicutes;c__Clostridia;o__Clostridiales;f__Ruminococcaceae;g__Ruminococcus	0.00868498	0.00518361	0.00239784	0.000967025	0.0073881	0.00408078	0.0282417	0.0462987
k__Bacteria;p__Bacteroidetes;c__Bacteroidia;o__Bacteroidales;f__Bacteroidaceae;g__Bacteroides	0.00829638	0.0144946	0.0292514	0.00459072	0.0526799	0.0479465	0.018139	0.00906953
k__Bacteria;p__Firmicutes;c__Clostridia;o__Clostridiales;f__Ruminococcaceae;g__Oscillospira	0.00786158	0.00620822	0.00525328	0.00462272	0.0136219	0.00966354	0.0172736	0.0189381
k__Bacteria;p__Firmicutes;c__Clostridia;o__Clostridiales;f__Veillonellaceae;g__Megamonas	0.00645799	0.0116686	0.00224243	0.000466812	0.000661226	0.00141499	1.65992e-05	0.000484396
k__Bacteria;p__Firmicutes;c__Clostridia;o__Clostridiales;f__Lachnospiraceae;g__[Ruminococcus]	0.0561423	0.0486477	0.0262258	0.0228502	0.0556938	0.0368698	0.364077	0.240198
k__Bacteria;p__Firmicutes;c__Clostridia;o__Clostridiales;f__Clostridiaceae;g__Candidatus	0.00490099	0.000177392	0.00490099	0.00260321	0.00108242	0.0219488	0.00828133	0.0173399
k__Bacteria;p__Firmicutes;c__Clostridia;o__Clostridiales;f__Lachnospiraceae;g__Dorea	0.002352	0.00460221	0.00361805	0.00323728	0.00415737	0.00168759	0.030628	0.0204618
k__Bacteria;p__Bacteroidetes;c__Bacteroidia;o__Bacteroidales;f__Porphyromonadaceae;g__Parabacteroides	0.0016962	0.00257981	0.00179503	0.000812421	0.00686207	0.00253578	0.00499497	0.00478116
k__Bacteria;p__Firmicutes;c__Bacilli;o__Lactobacillales;f__Enterococcaceae;g__Enterococcus	0.0015968	0.00289341	0.114228	0.209412	0.0185915	0.0260432	0.00103275	0.000258198
k__Bacteria;p__Firmicutes;c__Clostridia;o__Clostridiales;f__Lachnospiraceae;g__Blautia	0.000523399	0.00268561	0.000810412	0.000913824	0.00353214	0.000888195	0.033917	0.0150411
k__Bacteria;p__Firmicutes;c__Clostridia;o__Clostridiales;f__Lachnospiraceae;g__Coprococcus	0.000382599	0.0012634	0.000906414	0.00115583	0.00403476	0.00124459	0.0310384	0.0269028
k__Bacteria;p__Proteobacteria;c__Gammaproteobacteria;o__Pseudomonadales;f__Moraxellaceae;g__Acinetobacter	0.000252199	2.02001e-05	2.24003e-05	0.000527614	0.0113871	0.00219679	1.59993e-06	3.19998e-06
k__Bacteria;p__Firmicutes;c__Bacilli;o__Lactobacillales;f__Streptococcaceae;g__Streptococcus	0.000116	0.000291001	0.190748	0.105423	0.0642608	0.0522291	0.0185711	0.00374017
k__Bacteria;p__Firmicutes;c__Clostridia;o__Clostridiales;f__Dehalobacteriaceae;g__Dehalobacterium	7.81998e-05	6.50002e-05	0.000564409	0.00039021	0.00143586	0.000735396	0.004381	0.0100505
k__Archaea;p__Euryarchaeota;c__Methanobacteria;o__Methanobacteriales;f__Methanobacteriaceae;g__Methanobrevibacter	2.79999e-06	1.4e-06	0.00439367	0.00420031	0.00183047	0.00286898	0.00951176	0.00296818
k__Bacteria;p__Verrucomicrobia;c__Verrucomicrobiae;o__Verrucomicrobiales;f__Verrucomicrobiaceae;g__Akkermansia	1.4e-06	1.54e-05	0.000178203	0.000122803	0.000512821	0.000971394	4.81978e-05	0.0287018
k__Bacteria;p__Firmicutes;c__Clostridia;o__Clostridiales;f__Clostridiaceae;g__Clostridium	0	2.44001e-05	9.20014e-06	5.52014e-05	0.000690828	0.00170839	0.00711267	0.0219976
k__Bacteria;p__Proteobacteria;c__Deltaproteobacteria;o__Desulfovibrionales;f__Desulfovibrionaceae;g__Desulfovibrio	0	9.80003e-05	0.00235404	0.00263347	0.00875255	0.0102849	0.00194671	0.00382737
k__Bacteria;p__Proteobacteria;c__Gammaproteobacteria;o__Pasteurellales;f__Pasteurellaceae;g__Gallibacterium	0	0	0.000127602	0.0368041	0.00382195	0.000603796	6.11972e-05	1.11999e-05
k__Bacteria;p__Actinobacteria;c__Coriobacteriia;o__Coriobacteriales;f__Coriobacteriaceae;g__	4.79999e-05	0.0001744	0.00113242	0.00127223	0.00530261	0.00391138	0.00562354	0.134259
k__Bacteria;p__Proteobacteria;c__Gammaproteobacteria;o__Enterobacteriales;f__Enterobacteriaceae;g__	0.0571913	0.010984	0.0106132	0.0365163	0.184999	0.0676606	0.00021239	0.000131599
k__Bacteria;p__Firmicutes;c__Clostridia;o__Clostridiales;f__;g__	0.0269855	0.0307889	0.0229941	0.014082	0.0539726	0.0520747	0.234006	0.20317
k__Bacteria;p__Tenericutes;c__Mollicutes;o__RF39;f__;g__	0.0128068	0.00293341	0.00344665	0.00135884	0.00319513	0.000573997	0.00847061	0.00571816
k__Bacteria;p__Firmicutes;c__Erysipelotrichi;o__Erysipelotrichales;f__Erysipelotrichaceae;g__	0.00573359	0.00228241	0.00132322	0.000853022	0.00272211	0.000261398	0.00668309	0.0123619
k__Bacteria;p__Bacteroidetes;c__Bacteroidia;o__Bacteroidales;f__Rikenellaceae;g__	0.00544819	0.0265913	0.00263524	0.00101063	0.004925	0.00144919	0.000457379	0.000322598
k__Bacteria;p__Cyanobacteria;c__Chloroplast;o__Streptophyta;f__;g__	0.00352759	0.0100746	0.0193271	0.0159544	0.00126765	0.000857395	0	6.31995e-05
k__Bacteria;p__Firmicutes;c__Clostridia;o__Clostridiales;f__Veillonellaceae;g__	0.00313099	0.001532	0.00425206	0.000721019	0.0117137	0.0105307	0.00110315	0.000934793
k__Bacteria;p__Firmicutes;c__Clostridia;o__Clostridiales;f__Lachnospiraceae;g__	0.00259679	0.00782502	0.00518248	0.00272607	0.0119393	0.00503717	0.0729752	0.0649667
k__Bacteria;p__Proteobacteria;c__Alphaproteobacteria;o__Rickettsiales;f__mitochondria;Other	0.001381	0.0016614	0.00197603	0.00313468	0.00174847	0.00368138	0	5.99996e-06
k__Bacteria;p__Firmicutes;c__Erysipelotrichi;o__Erysipelotrichales;f__Erysipelotrichaceae;g__cc_115	0.000738199	0.000425601	0.000382406	0.000472212	0.000277811	7.15996e-05	0.00205171	0.00238358
Unassigned	0.000568399	0.000986003	0.000768612	0.00040081	0.00698168	0.0232883	0.00516656	0.00243458
k__Bacteria;p__Firmicutes;c__Erysipelotrichi;o__Erysipelotrichales;f__Erysipelotrichaceae;g__Coprobacillus	0.000565399	0.000752402	0.000270804	0.000183805	0.000554822	6.51996e-05	0.0022635	0.00335138
k__Bacteria;p__Cyanobacteria;c__4C0d-2;o__YS2;f__;g__	0.000463399	0.000387401	0.00252604	0.000828621	0.00377195	0.00199019	0.0106187	0.0175895
k__Bacteria;p__Firmicutes;c__Clostridia;o__Clostridiales;Other;Other	0.000432599	0.000541402	0.000152002	0.00037981	0.00112685	0.000151599	0.00354364	0.00182299
k__Bacteria;p__Proteobacteria;c__Betaproteobacteria;o__Burkholderiales;f__Alcaligenaceae;g__Sutterella	0.000425999	7.20002e-05	0.00103142	0.000489613	0.00188188	0.00219839	0.000470578	0.000362597
k__Bacteria;p__Proteobacteria;c__Epsilonproteobacteria;o__Campylobacterales;f__Helicobacteraceae;g__Helicobacter	0.000413999	0.000147	0.000358605	0.000312008	0.000205808	0.000250998	0.000590773	0.000149399
k__Bacteria;p__Actinobacteria;c__Actinobacteria;o__Bifidobacteriales;f__Bifidobacteriaceae;g__Bifidobacterium	0.000393599	0.0001338	0.00124042	0.000239806	8.26033e-05	1.93999e-05	0.000423181	0.000475196
k__Bacteria;p__Proteobacteria;c__Alphaproteobacteria;o__RF32;f__;g__	0.000305799	1.78e-05	6.8601e-05	3.7201e-05	0.0026059	0.000877995	0.000540175	0.000891393
k__Bacteria;p__Proteobacteria;c__Gammaproteobacteria;o__Enterobacteriales;f__Enterobacteriaceae;g__Escherichia	0.000276399	0	0	0	5.40022e-06	5.99996e-06	0	0
k__Bacteria;p__Firmicutes;c__Bacilli;o__Lactobacillales;f__Enterococcaceae;Other	0.0002332	0.000227601	0.00229463	0.0103531	0.0137654	0.0343314	1.59993e-06	5.79996e-06
k__Bacteria;p__Firmicutes;c__Bacilli;o__Bacillales;f__Bacillaceae;g__Bacillus	0.0002324	1.92001e-05	4.06006e-05	0.000243606	4.06016e-05	0.000239399	0	0
k__Bacteria;p__Bacteroidetes;c__Bacteroidia;o__Bacteroidales;f__[Odoribacteraceae];g__Odoribacter	0.0002046	0.0001478	0.000279204	0.000100603	0.00220309	0.000750595	0.000525776	0.000194799
k__Bacteria;p__Firmicutes;c__Clostridia;o__Clostridiales;f__Lachnospiraceae;Other	0.0001614	0.000654002	0.00151162	0.00101063	0.00147046	0.00102239	0.00849101	0.00807154
k__Bacteria;p__Firmicutes;c__Clostridia;o__Clostridiales;f__[Mogibacteriaceae];g__	0.0001582	0.000201801	0.00065021	0.000289607	0.000779631	0.000438997	0.00155173	0.00222418
k__Bacteria;p__Bacteroidetes;c__Bacteroidia;o__Bacteroidales;f__[Barnesiellaceae];g__	0.000127	0.000703602	0.000337405	0.000179005	0.000585423	0.000593396	0.00145473	0.000155799
k__Bacteria;p__Proteobacteria;c__Epsilonproteobacteria;o__Campylobacterales;f__Helicobacteraceae;g__	0.000126	0.000431001	0.00305645	0.00185025	0.0206534	0.0335162	7.59965e-06	2.41998e-05
k__Bacteria;p__Proteobacteria;c__Gammaproteobacteria;o__Enterobacteriales;f__Enterobacteriaceae;g__Erwinia	0.0001122	0	0	0	0	0	0	0
k__Bacteria;p__Firmicutes;c__Erysipelotrichi;o__Erysipelotrichales;f__Erysipelotrichaceae;g__[Eubacterium]	8.51998e-05	7.56002e-05	3.54005e-05	1.72004e-05	1.84007e-05	1.59999e-06	3.19985e-06	3.93997e-05
k__Bacteria;p__Proteobacteria;c__Betaproteobacteria;o__Burkholderiales;f__Oxalobacteraceae;g__Ralstonia	7.85998e-05	1.96001e-05	5.62009e-05	0.000192205	3.24013e-05	5.59997e-05	1.05995e-05	1.89999e-05
k__Bacteria;p__Proteobacteria;c__Gammaproteobacteria;o__Enterobacteriales;f__Enterobacteriaceae;Other	7.01999e-05	0.0001436	0.000605409	0.000964425	0.00110224	0.000178399	0	9.39993e-06
k__Bacteria;p__Lentisphaerae;c__[Lentisphaeria];o__Victivallales;f__Victivallaceae;g__	6.09999e-05	4.60001e-06	3.00005e-05	1.06003e-05	0.000230209	0.000103399	9.75955e-05	6.15995e-05
k__Bacteria;p__Proteobacteria;c__Deltaproteobacteria;o__Desulfovibrionales;f__Desulfovibrionaceae;g__	5.61999e-05	9.20003e-06	4.68007e-05	7.14018e-05	0.000640226	0.000214799	0.00021139	0.000136799
k__Bacteria;p__Firmicutes;c__Clostridia;o__Clostridiales;f__Christensenellaceae;g__	5.51999e-05	0.000268201	0.000355805	0.000422411	0.00173327	0.00160759	0.0100199	0.00610695
k__Bacteria;p__Bacteroidetes;c__Bacteroidia;o__Bacteroidales;f__Prevotellaceae;g__Prevotella	4.53999e-05	8.50002e-05	0.000701211	0.000326408	0.00275511	0.00137399	0.000183792	0.000241998
k__Bacteria;p__Firmicutes;c__Clostridia;o__Clostridiales;f__Clostridiaceae;g__	4.45999e-05	0.000299801	0.000534608	0.000189805	0.000516621	0.000695596	0.00322405	0.00390677
k__Bacteria;p__Firmicutes;c__Clostridia;o__Clostridiales;f__Dehalobacteriaceae;g__	4.25999e-05	0.000526601	0.000445407	0.000211605	0.000289012	5.37997e-05	0.00275167	0.00149359
k__Bacteria;p__Firmicutes;c__Bacilli;o__Bacillales;f__Staphylococcaceae;g__Staphylococcus	3.89999e-05	5.00001e-05	3.80006e-05	4.82012e-05	0.00023781	3.13998e-05	0	1.59999e-06
k__Bacteria;p__Fusobacteria;c__Fusobacteriia;o__Fusobacteriales;f__Fusobacteriaceae;g__Fusobacterium	3.73999e-05	6.00002e-06	0.000138002	0.000210805	6.44026e-05	0.00601596	0.000102395	1.13999e-05
k__Bacteria;p__Actinobacteria;c__Actinobacteria;o__Actinomycetales;f__Micrococcaceae;Other	3.57999e-05	0.0001774	9.10014e-05	0.000252007	0.000140806	2.95998e-05	0	2.05998e-05
k__Bacteria;p__Proteobacteria;c__Betaproteobacteria;o__Burkholderiales;f__Comamonadaceae;Other	3.47999e-05	2.04001e-05	0.000192003	0.000206405	0.000104804	0.000170999	0	0
k__Bacteria;p__Actinobacteria;c__Actinobacteria;o__Actinomycetales;f__Micrococcaceae;g__Rothia	3.33999e-05	3.00001e-06	0.000139402	0.000104603	4.86019e-05	0	0	0
k__Bacteria;p__Actinobacteria;c__Actinobacteria;o__Actinomycetales;f__Corynebacteriaceae;g__Corynebacterium	3.29999e-05	3.14001e-05	5.60009e-06	0.000103003	0.00074303	0.000352598	0	0
k__Bacteria;p__Firmicutes;c__Bacilli;o__Bacillales;f__Planococcaceae;g__Lysinibacillus	2.53999e-05	2.66001e-05	0.000161002	0.000345809	0.000138806	0.000136199	4.59979e-06	1.87999e-05
k__Bacteria;p__Bacteroidetes;c__Bacteroidia;o__Bacteroidales;f__[Paraprevotellaceae];g__Paraprevotella	2.32e-05	4.60001e-06	0	1.38004e-05	1.08004e-05	0.000511797	0	2.65998e-05
k__Bacteria;p__[Thermi];c__Deinococci;o__Thermales;f__Thermaceae;g__Meiothermus	2.02e-05	1.32e-05	2.92004e-05	0.000162004	8.10032e-05	2.67998e-05	2.99986e-06	1.11999e-05
k__Bacteria;p__Firmicutes;c__Clostridia;o__Clostridiales;f__Ruminococcaceae;g__Anaerotruncus	1.78e-05	2.40001e-05	3.30005e-05	7.40019e-06	0.000111004	5.73997e-05	0.000302586	0.000418797
k__Bacteria;p__Firmicutes;c__Clostridia;o__Clostridiales;f__Veillonellaceae;g__Veillonella	1.76e-05	1.78e-05	0.00373346	7.36019e-05	0.00569763	0.000134399	8.57961e-05	2.25998e-05
k__Bacteria;p__Proteobacteria;c__Gammaproteobacteria;o__Enterobacteriales;f__Enterobacteriaceae;g__Proteus	1.42e-05	1.02e-05	2.32004e-05	9.58025e-05	4.40018e-06	0	0	0
k__Bacteria;p__Proteobacteria;c__Betaproteobacteria;o__Burkholderiales;f__Oxalobacteraceae;Other	1.36e-05	6.00002e-06	1.18002e-05	1.60004e-06	0	0	0	0
k__Bacteria;p__Actinobacteria;c__Coriobacteriia;o__Coriobacteriales;f__Coriobacteriaceae;g__Slackia	1.16e-05	9.00003e-06	9.20014e-06	3.8801e-05	0.000172407	3.59998e-05	0.000414381	0.000119399
k__Bacteria;p__Firmicutes;c__Clostridia;o__Clostridiales;f__Veillonellaceae;g__Phascolarctobacterium	8.59998e-06	1.48e-05	6.9001e-05	7.7602e-05	6.20025e-06	1.59999e-06	0	0
k__Bacteria;p__[Thermi];c__Deinococci;o__Deinococcales;f__Trueperaceae;g__Truepera	8.59998e-06	0	0	0	0	0	0	0
k__Bacteria;p__Firmicutes;c__Clostridia;o__Clostridiales;f__Veillonellaceae;g__Dialister	6.99999e-06	0	3.80006e-06	0	0	1.45999e-05	0	0
k__Bacteria;p__Proteobacteria;c__Betaproteobacteria;o__Rhodocyclales;f__Rhodocyclaceae;Other	5.79999e-06	0	1.80003e-06	2.06005e-05	0	1.59999e-06	0	1.59999e-06
k__Bacteria;p__Firmicutes;c__Clostridia;o__Clostridiales;f__Lachnospiraceae;g__Lachnobacterium	5.79999e-06	0	0	0	0	0	0	0
k__Bacteria;p__Firmicutes;c__Erysipelotrichi;o__Erysipelotrichales;f__Erysipelotrichaceae;g__Holdemania	4.59999e-06	1.22e-05	0.000132602	0.000189805	0.000110804	5.05997e-05	0.000953556	0.000653795
k__Bacteria;p__Firmicutes;c__Clostridia;o__Clostridiales;f__Lachnospiraceae;g__Roseburia	4.59999e-06	3.00001e-06	0	3.20008e-05	2.72011e-05	0	0	0
k__Bacteria;p__Firmicutes;c__Clostridia;o__Clostridiales;f__Lachnospiraceae;g__Lachnospira	4.39999e-06	0.0001678	0.000526208	8.20021e-05	1.62006e-05	2.99998e-06	0	1.29999e-05
k__Bacteria;p__Firmicutes;c__Bacilli;o__Lactobacillales;f__Aerococcaceae;g__Facklamia	4.39999e-06	3.00001e-06	0	1.02003e-05	1.88008e-05	1.47999e-05	0	0
k__Bacteria;p__Actinobacteria;c__Actinobacteria;o__Actinomycetales;f__Brevibacteriaceae;g__Brevibacterium	2.79999e-06	1.6e-06	0	0	1.92008e-05	3.47998e-05	0	0
k__Bacteria;p__Actinobacteria;c__Actinobacteria;o__Actinomycetales;f__Pseudonocardiaceae;g__Saccharopolyspora	2.79999e-06	0	3.80006e-06	2.04005e-05	1.40006e-06	1.59999e-06	0	0
k__Bacteria;p__Firmicutes;c__Bacilli;o__Lactobacillales;f__Aerococcaceae;Other	2.79999e-06	7.20002e-06	0	4.80012e-06	4.00016e-06	0	0	0
k__Bacteria;p__[Thermi];c__Deinococci;o__Deinococcales;f__Deinococcaceae;g__CM44	2.79999e-06	0	0	3.20008e-06	0	0	0	0
k__Bacteria;p__Proteobacteria;c__Gammaproteobacteria;o__Pasteurellales;f__Pasteurellaceae;g__Avibacterium	2.4e-06	0	1.70003e-05	0.000187405	6.00024e-06	2.99998e-06	0	0
k__Bacteria;p__Proteobacteria;c__Gammaproteobacteria;o__Aeromonadales;f__Aeromonadaceae;g__	2.4e-06	0	0	0	3.20013e-06	1.59999e-06	0	0
k__Bacteria;p__Actinobacteria;c__Coriobacteriia;o__Coriobacteriales;f__Coriobacteriaceae;g__Eggerthella	1.4e-06	0.000224201	7.22011e-05	1.46004e-05	4.00016e-06	5.99996e-06	0.000407181	1.45999e-05
k__Bacteria;p__Proteobacteria;c__Gammaproteobacteria;o__Pseudomonadales;f__Pseudomonadaceae;g__Pseudomonas	1.4e-06	6.00002e-06	2.36004e-05	7.42019e-05	1.06004e-05	6.35996e-05	0	3.19998e-06
k__Bacteria;p__Firmicutes;c__Bacilli;o__Lactobacillales;f__Carnobacteriaceae;g__Trichococcus	1.4e-06	0	0	0	9.06036e-05	0.000141999	0	0
k__Bacteria;p__[Thermi];c__Deinococci;o__Thermales;f__Thermaceae;g__Thermus	1.4e-06	0	4.40007e-06	0	1.04004e-05	1.19999e-05	0	0
k__Bacteria;p__Proteobacteria;c__Alphaproteobacteria;o__Rhizobiales;f__Methylobacteriaceae;g__Methylobacterium	1.4e-06	1.6e-06	0	4.10011e-05	0	9.19994e-06	0	0
k__Bacteria;p__Proteobacteria;c__Betaproteobacteria;o__Burkholderiales;f__Burkholderiaceae;g__Burkholderia	1.4e-06	0	1.36002e-05	2.38006e-05	0	2.99998e-06	0	0
k__Bacteria;p__Proteobacteria;c__Gammaproteobacteria;o__Pseudomonadales;f__Moraxellaceae;g__Enhydrobacter	1.4e-06	0	0	4.40011e-06	1.62006e-05	2.99998e-06	0	0
k__Bacteria;p__Actinobacteria;c__Actinobacteria;o__Actinomycetales;f__Actinomycetaceae;g__	1.4e-06	0	0	4.40011e-06	1.80007e-06	0	0	0
k__Bacteria;p__Synergistetes;c__Synergistia;o__Synergistales;f__Synergistaceae;g__	0	5.56002e-05	0.00137002	0.00039081	0.0122711	0.00905695	0.00531056	0.0159473
k__Bacteria;p__WPS-2;c__;o__;f__;g__	0	0	0	0.00112743	0.00023981	0.00399318	2.99986e-06	0.00742555
k__Bacteria;p__Firmicutes;c__Clostridia;o__Clostridiales;f__Peptococcaceae;g__Peptococcus	0	0	0.000115402	0.000480012	0.000637826	0.000442197	0.00129414	0.00416017
k__Bacteria;p__Actinobacteria;c__Coriobacteriia;o__Coriobacteriales;f__Coriobacteriaceae;g__Adlercreutzia	0	0	1.80003e-06	2.44006e-05	0.000172407	0.000202399	0.00133474	0.00197919
k__Bacteria;p__Bacteroidetes;c__Bacteroidia;o__Bacteroidales;f__;g__	0	0	8.50013e-05	0.000643817	0.0049404	0.00392578	0.000476378	0.00191799
k__Bacteria;p__Verrucomicrobia;c__Verruco-5;o__WCHB1-41;f__RFP12;g__	0	0	0	1.72004e-05	0.00678887	0.00142859	0.00262128	0.00179659
k__Bacteria;p__Proteobacteria;c__Epsilonproteobacteria;o__Campylobacterales;f__Campylobacteraceae;g__Campylobacter	0	0	0.000255604	0.000340209	0.000352414	0.000372198	0.000933957	0.000970993
k__Bacteria;p__Proteobacteria;c__Alphaproteobacteria;o__;f__;g__	0	1.4e-06	3.44005e-05	5.26014e-05	0.000320213	0.00123879	0.000963756	0.000696395
k__Bacteria;p__TM7;c__TM7-3;o__CW040;f__F16;g__	0	0	0.000949414	0.000342209	0.000986639	8.75995e-05	0.00258028	0.000600596
k__Bacteria;p__Firmicutes;c__Clostridia;o__Clostridiales;f__Christensenellaceae;g__Christensenella	0	3.66001e-05	2.78004e-05	2.94008e-05	0.000168607	4.27997e-05	0.000583173	0.000520996
k__Bacteria;p__Deferribacteres;c__Deferribacteres;o__Deferribacterales;f__Deferribacteraceae;g__Mucispirillum	0	0	6.7001e-05	0.000143204	0.000324413	0.000280598	0.000752565	0.000430197
k__Bacteria;p__Elusimicrobia;c__Elusimicrobia;o__Elusimicrobiales;f__Elusimicrobiaceae;g__	0	0	0.00068581	1.64004e-05	0.000205208	0.00153279	1.59993e-06	0.000428597
k__Bacteria;p__Verrucomicrobia;c__Opitutae;o__[Cerasicoccales];f__[Cerasicoccaceae];g__	0	0	4.38007e-05	1.26003e-05	9.80039e-05	0.000257398	0.000158793	0.000383797
k__Archaea;p__Euryarchaeota;c__Methanomicrobia;o__Methanomicrobiales;f__Methanocorpusculaceae;g__Methanocorpusculum	0	0	0.000624409	3.34009e-05	4.64019e-05	0.000191999	0	0.000351397
k__Bacteria;p__Firmicutes;c__Clostridia;o__Clostridiales;f__Lachnospiraceae;g__Anaerostipes	0	4.40001e-06	9.80015e-05	3.28008e-05	0.000195408	6.39996e-05	0.00107115	0.000342397
k__Bacteria;p__Spirochaetes;c__Spirochaetes;o__Sphaerochaetales;f__Sphaerochaetaceae;g__Sphaerochaeta	0	0	1.14002e-05	3.22008e-05	0.00148626	8.27995e-05	0.000153193	0.000304798
k__Bacteria;p__TM7;c__TM7-3;o__I025;f__Rs-045;g__	0	0	7.66012e-05	0.00076542	0.000924237	0.000127799	0.00129914	0.000242198
k__Bacteria;p__Bacteroidetes;c__Bacteroidia;o__Bacteroidales;f__[Paraprevotellaceae];g__	0	0	0.000116202	9.24024e-05	0.000954238	0.000833195	0.00066117	0.000236598
k__Bacteria;p__Firmicutes;c__Erysipelotrichi;o__Erysipelotrichales;f__Erysipelotrichaceae;g__p-75-a5	0	0	0	0	1.80007e-06	7.59995e-06	0	0.000166199
k__Archaea;p__Euryarchaeota;c__Thermoplasmata;o__E2;f__[Methanomassiliicoccaceae];g__vadinCA11	0	0	7.18011e-05	0	7.90032e-05	0.000104599	2.55988e-05	0.000163999
k__Bacteria;p__Firmicutes;c__Clostridia;o__Clostridiales;f__Ruminococcaceae;Other	0	7.40002e-06	6.8001e-06	0	3.40014e-06	2.27999e-05	4.3998e-05	0.000127199
k__Bacteria;p__Bacteroidetes;c__Bacteroidia;o__Bacteroidales;f__S24-7;g__	0	0	7.46011e-05	3.04008e-05	0.000934437	0.000798595	2.2599e-05	0.000116199
k__Bacteria;p__Bacteroidetes;c__Bacteroidia;o__Bacteroidales;f__BS11;g__	0	0	0	3.40009e-06	9.72039e-05	2.85998e-05	9.15958e-05	9.61993e-05
k__Bacteria;p__Firmicutes;c__Clostridia;o__Clostridiales;f__[Mogibacteriaceae];g__Anaerovorax	0	0	5.80009e-06	9.00023e-06	1.36005e-05	1.59999e-06	1.19994e-05	5.33996e-05
k__Bacteria;p__Firmicutes;c__Clostridia;o__Clostridiales;f__Eubacteriaceae;g__Anaerofustis	0	0	3.80006e-06	0	5.24021e-05	8.99995e-06	0.000265988	5.29996e-05
k__Bacteria;p__Proteobacteria;c__Deltaproteobacteria;o__Desulfovibrionales;f__Desulfovibrionaceae;g__Bilophila	0	5.32001e-05	0.000209403	1.80005e-05	0.000268411	7.51995e-05	0.000121594	5.09996e-05
k__Bacteria;p__Firmicutes;c__Clostridia;o__;f__;g__	0	0	0	4.40011e-06	2.02008e-05	1.51999e-05	3.75983e-05	4.27997e-05
k__Bacteria;p__Actinobacteria;c__Coriobacteriia;o__Coriobacteriales;f__Coriobacteriaceae;g__Collinsella	0	0	1.40002e-06	6.40017e-06	3.66015e-05	7.59995e-06	0	3.91997e-05
k__Bacteria;p__Firmicutes;c__Clostridia;o__Clostridiales;f__Syntrophomonadaceae;g__Syntrophomonas	0	0	0	0	9.40038e-06	1.95999e-05	4.05981e-05	3.07998e-05
k__Bacteria;p__Firmicutes;c__Clostridia;o__Clostridiales;f__Christensenellaceae;Other	0	0	1.80003e-06	0	0	2.99998e-06	0.000317385	2.69998e-05
k__Bacteria;p__Proteobacteria;c__Gammaproteobacteria;o__Aeromonadales;f__Succinivibrionaceae;g__	0	0	9.20014e-06	2.24006e-05	0.000196408	0.000452797	5.99972e-06	2.59998e-05
k__Bacteria;p__Firmicutes;c__Clostridia;o__Clostridiales;f__Peptococcaceae;g__	0	0	0	0	1.40006e-06	1.05999e-05	1.35994e-05	2.59998e-05
k__Bacteria;p__Bacteroidetes;c__Bacteroidia;o__Bacteroidales;f__Rikenellaceae;g__Rikenella	0	3.32001e-05	0.000101402	8.28021e-05	0.000368215	4.89997e-05	0.00020899	2.41998e-05
k__Bacteria;p__Actinobacteria;c__Coriobacteriia;o__Coriobacteriales;f__Coriobacteriaceae;Other	0	0	0	0	0	1.59999e-06	0	1.65999e-05
k__Bacteria;p__Firmicutes;c__Clostridia;o__Clostridiales;f__EtOH8;g__	0	0	5.80009e-06	1.50004e-05	4.40018e-06	2.41999e-05	2.99986e-06	1.49999e-05
k__Bacteria;p__Firmicutes;c__Clostridia;o__SHA-98;f__;g__	0	0	8.80013e-06	0	3.00012e-05	8.59995e-05	7.59965e-06	1.27999e-05
k__Bacteria;p__Bacteroidetes;c__Bacteroidia;o__Bacteroidales;f__[Odoribacteraceae];g__Butyricimonas	0	0	8.38013e-05	2.24006e-05	6.54026e-05	2.81998e-05	5.99972e-06	7.99994e-06
k__Bacteria;p__Proteobacteria;c__Alphaproteobacteria;o__Rhizobiales;f__Brucellaceae;g__Ochrobactrum	0	1.4e-06	0	9.24024e-05	1.80007e-06	2.33999e-05	0	4.99996e-06
k__Bacteria;p__Firmicutes;c__Bacilli;o__Turicibacterales;f__Turicibacteraceae;g__Turicibacter	0	9.80003e-05	0	2.10005e-05	0.000697828	0.000822795	0	3.59997e-06
k__Bacteria;p__Proteobacteria;c__Betaproteobacteria;o__Burkholderiales;f__Oxalobacteraceae;g__Oxalobacter	0	3.00001e-06	9.00014e-06	1.60004e-06	6.26025e-05	8.89995e-05	4.59979e-06	3.39997e-06
k__Bacteria;p__Bacteroidetes;c__Bacteroidia;o__Bacteroidales;f__Porphyromonadaceae;g__Tannerella	0	0	0	0	5.40022e-06	6.15996e-05	0	3.39997e-06
k__Bacteria;p__Bacteroidetes;c__Bacteroidia;o__Bacteroidales;f__[Barnesiellaceae];Other	0	0	0	3.20008e-06	0.00108524	1.39999e-06	0	1.99999e-06
k__Bacteria;p__Tenericutes;c__Mollicutes;o__Mycoplasmatales;f__Mycoplasmataceae;g__	0	0	9.60015e-06	0.000115603	0.000625625	0.000230199	0	1.59999e-06
k__Bacteria;p__Firmicutes;c__Clostridia;o__Clostridiales;f__Veillonellaceae;g__Megasphaera	0	0	0	6.20016e-06	9.00036e-06	0.000154199	0	1.59999e-06
k__Bacteria;p__Firmicutes;c__Clostridia;o__Clostridiales;f__Peptostreptococcaceae;g__	0	0	6.8001e-06	3.40009e-05	0.000113205	6.45996e-05	0	1.59999e-06
k__Bacteria;p__Actinobacteria;c__Actinobacteria;o__Actinomycetales;f__Microbacteriaceae;g__Microbacterium	0	0	7.26011e-05	3.8801e-05	2.28009e-05	1.81999e-05	0	1.59999e-06
k__Bacteria;p__Proteobacteria;c__Betaproteobacteria;o__Rhodocyclales;f__Rhodocyclaceae;g__Hydrogenophilus	0	3.00001e-06	1.80003e-05	2.88007e-05	4.00016e-05	1.65999e-05	1.59993e-06	1.59999e-06
k__Bacteria;p__Proteobacteria;c__Alphaproteobacteria;o__Sphingomonadales;f__Sphingomonadaceae;g__Sphingomonas	0	4.40001e-06	3.00005e-06	2.76007e-05	1.14005e-05	1.05999e-05	0	1.59999e-06
k__Bacteria;p__Actinobacteria;c__Actinobacteria;o__Actinomycetales;f__Propionibacteriaceae;g__Propionibacterium	0	0	1.48002e-05	4.84012e-05	0	0	0	1.59999e-06
k__Bacteria;p__Firmicutes;c__Bacilli;o__Bacillales;f__Planococcaceae;g__Solibacillus	0	0	1.08002e-05	1.30003e-05	0.000280211	0.00115879	0	0
k__Bacteria;p__Firmicutes;c__Clostridia;o__Clostridiales;f__Clostridiaceae;g__SMB53	0	0	0	0	2.12008e-05	0.000940594	0	0
k__Bacteria;p__Firmicutes;c__Bacilli;o__Bacillales;f__Paenibacillaceae;g__Paenibacillus	0	0	3.40005e-06	5.50014e-05	2.70011e-05	0.000937594	0	0
k__Bacteria;p__Firmicutes;c__Bacilli;o__Bacillales;f__Planococcaceae;g__Rummeliibacillus	0	0	0.000127002	0.00107903	0.00190328	0.000746596	0	0
k__Bacteria;p__Firmicutes;c__Bacilli;o__Lactobacillales;f__Aerococcaceae;g__Aerococcus	0	0	0	0	0.000775631	0.000265598	0	0
k__Bacteria;p__Firmicutes;c__Bacilli;o__Bacillales;f__Bacillaceae;g__	0	3.00001e-06	1.18002e-05	5.26014e-05	6.22025e-05	8.45995e-05	0	0
k__Bacteria;p__Proteobacteria;c__Betaproteobacteria;o__Burkholderiales;f__Comamonadaceae;g__Comamonas	0	0	0	2.00005e-06	3.24013e-05	7.83995e-05	0	0
k__Bacteria;p__Firmicutes;c__Bacilli;o__Lactobacillales;f__Streptococcaceae;g__Lactococcus	0	1.04e-05	6.8001e-06	0.000549014	0.000125205	6.79996e-05	3.19985e-06	0
k__Bacteria;p__[Thermi];c__Deinococci;o__Deinococcales;f__Deinococcaceae;g__Deinococcus	0	0	1.80003e-06	4.20011e-06	2.28009e-05	6.23996e-05	0	0
k__Bacteria;p__Firmicutes;c__Clostridia;o__Clostridiales;f__Clostridiaceae;Other	0	0	0	1.40004e-06	1.10004e-05	5.59997e-05	0	0
k__Bacteria;p__Firmicutes;c__Clostridia;o__Clostridiales;f__Lachnospiraceae;g__Epulopiscium	0	0	0	0	1.80007e-06	4.97997e-05	0	0
k__Bacteria;p__Firmicutes;c__Bacilli;o__Lactobacillales;Other;Other	0	0	0	0	3.60014e-06	4.23997e-05	0	0
k__Bacteria;p__Actinobacteria;c__Actinobacteria;o__Actinomycetales;f__Micrococcaceae;g__Arthrobacter	0	0	1.40002e-06	9.80025e-06	0.000648226	3.73998e-05	0	0
k__Bacteria;p__Firmicutes;c__Clostridia;o__Clostridiales;f__Veillonellaceae;g__Acidaminococcus	0	0	0	0	0	3.21998e-05	0	0
k__Bacteria;p__Firmicutes;c__Bacilli;o__Bacillales;f__Planococcaceae;g__Sporosarcina	0	4.40001e-06	2.20003e-05	0	8.32033e-05	2.71998e-05	0	0
k__Bacteria;p__Proteobacteria;c__Alphaproteobacteria;o__Rhizobiales;f__Rhizobiaceae;g__Agrobacterium	0	4.20001e-06	5.80009e-06	6.60017e-05	3.80015e-06	2.55998e-05	0	0
k__Bacteria;p__TM7;c__TM7-3;o__;f__;g__	0	0	0	9.02023e-05	1.44006e-05	1.77999e-05	0	0
k__Bacteria;p__Firmicutes;c__Bacilli;o__Bacillales;f__Staphylococcaceae;g__Jeotgalicoccus	0	4.40001e-06	0	0	0.000517621	1.35999e-05	0	0
k__Bacteria;p__Actinobacteria;c__Actinobacteria;o__Actinomycetales;f__Microbacteriaceae;g__	0	0	0	2.00005e-06	1.40006e-06	1.31999e-05	0	0
k__Bacteria;p__Acidobacteria;c__[Chloracidobacteria];o__RB41;f__;g__	0	0	0	0	0	1.31999e-05	0	0
k__Bacteria;p__Actinobacteria;c__Actinobacteria;o__Actinomycetales;f__Dermabacteraceae;g__Brachybacterium	0	0	0	8.20021e-06	3.96016e-05	1.21999e-05	0	0
k__Bacteria;p__Bacteroidetes;c__Flavobacteriia;o__Flavobacteriales;f__[Weeksellaceae];g__Chryseobacterium	0	0	0	1.42004e-05	1.46006e-05	1.19999e-05	0	0
k__Bacteria;p__Actinobacteria;c__Actinobacteria;o__Actinomycetales;f__Microbacteriaceae;g__Curtobacterium	0	0	4.80007e-06	5.12013e-05	3.00012e-06	8.99995e-06	0	0
k__Bacteria;p__Actinobacteria;c__Actinobacteria;o__Actinomycetales;f__Micrococcaceae;g__Kocuria	0	0	0	9.00023e-06	7.4003e-06	8.99995e-06	0	0
k__Bacteria;p__Proteobacteria;c__Alphaproteobacteria;o__Caulobacterales;f__Caulobacteraceae;g__	0	0	7.60012e-06	3.9001e-05	2.00008e-05	7.59995e-06	0	0
k__Bacteria;p__Firmicutes;c__Bacilli;o__Bacillales;f__;g__	0	0	1.40002e-06	4.20011e-06	6.00024e-06	7.59995e-06	0	0
k__Bacteria;p__Actinobacteria;c__Actinobacteria;o__Actinomycetales;f__;g__	0	0	0	0	2.00008e-06	7.59995e-06	0	0
k__Bacteria;p__Proteobacteria;c__Betaproteobacteria;o__Burkholderiales;f__Comamonadaceae;g__	0	0	2.00003e-06	4.42011e-05	1.88008e-05	7.39996e-06	0	0
k__Bacteria;p__Firmicutes;c__Bacilli;o__Bacillales;f__Staphylococcaceae;g__Macrococcus	0	0	0.000109002	3.46009e-05	0.000120405	7.39996e-06	0	0
k__Bacteria;p__Proteobacteria;c__Alphaproteobacteria;o__Rhizobiales;f__Methylobacteriaceae;g__	0	0	1.18002e-05	2.72007e-05	3.00012e-06	6.19996e-06	0	0
k__Bacteria;p__Actinobacteria;c__Actinobacteria;o__Actinomycetales;f__Mycobacteriaceae;g__Mycobacterium	0	0	4.40007e-06	8.20021e-06	3.20013e-06	5.99996e-06	0	0
k__Bacteria;p__Proteobacteria;c__Gammaproteobacteria;o__Xanthomonadales;f__Xanthomonadaceae;g__Xanthomonas	0	0	1.40002e-06	2.02005e-05	0	4.59997e-06	0	0
k__Bacteria;p__Actinobacteria;c__Actinobacteria;o__Actinomycetales;f__Gordoniaceae;g__Gordonia	0	0	5.20008e-06	1.60004e-06	4.40018e-06	4.59997e-06	0	0
k__Bacteria;p__Actinobacteria;c__Actinobacteria;o__Actinomycetales;f__Microbacteriaceae;g__Leucobacter	0	0	0	0	6.16025e-05	4.59997e-06	0	0
k__Bacteria;p__Proteobacteria;c__Betaproteobacteria;o__Burkholderiales;f__Oxalobacteraceae;g__Cupriavidus	0	4.60001e-06	9.60015e-06	6.52017e-05	1.98008e-05	4.39997e-06	0	0
k__Bacteria;p__Firmicutes;c__Bacilli;o__Lactobacillales;f__Leuconostocaceae;g__	0	0.0001082	0	1.12003e-05	2.00008e-05	4.39997e-06	2.99986e-06	0
k__Bacteria;p__Actinobacteria;c__Actinobacteria;o__Actinomycetales;f__Intrasporangiaceae;g__	0	0	2.00003e-06	0	0	4.39997e-06	0	0
k__Bacteria;p__Bacteroidetes;c__Flavobacteriia;o__Flavobacteriales;f__Flavobacteriaceae;g__Myroides	0	0	0	0	0	4.39997e-06	0	0
k__Bacteria;p__Firmicutes;c__Bacilli;o__Bacillales;f__Bacillaceae;g__Natronobacillus	0	0	0	0	3.80015e-06	3.19998e-06	0	0
k__Bacteria;p__Proteobacteria;c__Gammaproteobacteria;o__Xanthomonadales;f__Xanthomonadaceae;g__Luteibacter	0	0	0	2.54007e-05	0	2.99998e-06	0	0
k__Bacteria;p__Proteobacteria;c__Gammaproteobacteria;o__Pasteurellales;f__Pasteurellaceae;g__	0	0	0	1.78005e-05	1.80007e-06	2.99998e-06	0	0
k__Bacteria;p__Proteobacteria;c__Alphaproteobacteria;o__Rhizobiales;f__Aurantimonadaceae;g__	0	0	0	1.54004e-05	2.00008e-06	2.99998e-06	0	0
k__Bacteria;p__Proteobacteria;c__Betaproteobacteria;o__Burkholderiales;f__Alcaligenaceae;g__Achromobacter	0	4.40001e-06	0	5.24014e-05	0	1.59999e-06	0	0
k__Bacteria;p__Firmicutes;c__Bacilli;o__Bacillales;f__Bacillaceae;g__Oceanobacillus	0	0	0	0	8.80035e-06	1.39999e-06	0	0
k__Bacteria;p__Firmicutes;c__Erysipelotrichi;o__Erysipelotrichales;f__Erysipelotrichaceae;Other	0	1.34e-05	5.32008e-05	7.8402e-05	1.78007e-05	0	3.61983e-05	0
k__Bacteria;p__Proteobacteria;c__Alphaproteobacteria;o__Rhizobiales;Other;Other	0	0	0	5.18013e-05	0	0	0	0
k__Bacteria;p__Proteobacteria;c__Alphaproteobacteria;o__Rhodospirillales;f__Acetobacteraceae;g__	0	1.6e-06	0	3.34009e-05	0	0	0	0
k__Bacteria;p__Bacteroidetes;c__Bacteroidia;o__Bacteroidales;f__Porphyromonadaceae;g__Dysgonomonas	0	0	0	2.60007e-05	2.6001e-05	0	0	0
k__Bacteria;p__Bacteroidetes;c__Sphingobacteriia;o__Sphingobacteriales;f__Sphingobacteriaceae;g__Sphingobacterium	0	3.00001e-06	0	2.06005e-05	0	0	0	0
k__Bacteria;p__Proteobacteria;c__Gammaproteobacteria;o__Xanthomonadales;f__Xanthomonadaceae;g__Stenotrophomonas	0	3.00001e-06	9.98015e-05	1.84005e-05	6.60026e-06	0	0	0
k__Bacteria;p__Firmicutes;c__Clostridia;o__Clostridiales;f__Eubacteriaceae;g__Pseudoramibacter_Eubacterium	0	0	1.28002e-05	1.46004e-05	0	0	0	0
k__Bacteria;p__Proteobacteria;c__Gammaproteobacteria;o__Pasteurellales;f__Pasteurellaceae;g__Haemophilus	0	0	3.30005e-05	1.32003e-05	8.00032e-06	0	0	0
k__Bacteria;p__Actinobacteria;c__Actinobacteria;o__Actinomycetales;f__Nocardiaceae;Other	0	0	0	1.14003e-05	0	0	0	0
k__Bacteria;p__Fusobacteria;c__Fusobacteriia;o__Fusobacteriales;f__Leptotrichiaceae;g__Leptotrichia	0	0	0	1.14003e-05	0	0	0	0
k__Bacteria;p__Firmicutes;c__Bacilli;o__Bacillales;f__Planococcaceae;Other	0	0	1.02002e-05	1.04003e-05	0	0	0	0
k__Bacteria;p__Bacteroidetes;c__Sphingobacteriia;o__Sphingobacteriales;f__Sphingobacteriaceae;g__	0	0	0	6.40017e-06	6.00024e-06	0	0	0
k__Bacteria;p__Actinobacteria;c__Actinobacteria;o__Bifidobacteriales;f__Bifidobacteriaceae;g__	0	0	0	6.40017e-06	2.00008e-06	0	0	0
k__Bacteria;p__Actinobacteria;c__Actinobacteria;o__Actinomycetales;f__Streptomycetaceae;g__Streptomyces	0	0	0	6.40017e-06	0	0	0	0
k__Bacteria;p__Firmicutes;c__Bacilli;o__Bacillales;f__Paenibacillaceae;g__Aneurinibacillus	0	0	0	6.20016e-06	0	0	0	0
k__Bacteria;p__Firmicutes;c__Clostridia;o__Clostridiales;f__Clostridiaceae;g__Caloramator	0	0	0	6.20016e-06	0	0	0	0
k__Bacteria;p__Proteobacteria;c__Alphaproteobacteria;o__Rhizobiales;f__Hyphomicrobiaceae;g__Rhodoplanes	0	0	0	6.20016e-06	0	0	0	0
k__Bacteria;p__Proteobacteria;c__Alphaproteobacteria;o__Caulobacterales;f__Caulobacteraceae;g__Phenylobacterium	0	0	0	6.00015e-06	0	0	0	0
k__Bacteria;p__Proteobacteria;c__Betaproteobacteria;o__Burkholderiales;f__Comamonadaceae;g__Tepidimonas	0	0	0	6.00015e-06	0	0	0	0
k__Bacteria;p__Proteobacteria;c__Gammaproteobacteria;o__Xanthomonadales;f__Sinobacteraceae;g__	0	0	0	5.80015e-06	5.60022e-06	0	0	0
k__Bacteria;p__Firmicutes;c__Clostridia;o__Clostridiales;f__[Tissierellaceae];g__Anaerococcus	0	0	0	5.80015e-06	0	0	0	0
k__Bacteria;p__Firmicutes;c__Bacilli;o__Lactobacillales;f__Lactobacillaceae;g__Pediococcus	0	0.0001416	4.40007e-06	4.80012e-06	8.00032e-06	0	0	0
k__Bacteria;p__Proteobacteria;c__Betaproteobacteria;o__Burkholderiales;f__;g__	0	0	0	4.80012e-06	0	0	0	0
k__Archaea;p__Euryarchaeota;c__Halobacteria;o__Halobacteriales;f__Halobacteriaceae;g__Halorubrum	0	0	0	4.20011e-06	3.20013e-06	0	0	0
k__Bacteria;p__Proteobacteria;c__Alphaproteobacteria;o__Rhizobiales;f__;g__	0	0	3.00005e-06	3.40009e-06	3.80015e-06	0	0	0
k__Bacteria;p__Bacteroidetes;c__Bacteroidia;o__Bacteroidales;f__Rikenellaceae;Other	0	0.0001042	0	0	0	0	0	0
k__Bacteria;p__Actinobacteria;c__Actinobacteria;o__Actinomycetales;Other;Other	0	3.00001e-06	0	0	4.60018e-06	0	0	0
k__Bacteria;p__Proteobacteria;c__Epsilonproteobacteria;o__Campylobacterales;f__Helicobacteraceae;Other	0	0	0	0	0	0	0.000131194	0
k__Bacteria;p__Firmicutes;c__Clostridia;o__Clostridiales;f__Gracilibacteraceae;g__Gracilibacter	0	0	0	0	0	0	1.49993e-05	0
k__Bacteria;p__Actinobacteria;c__Actinobacteria;o__Actinomycetales;f__Jonesiaceae;Other	0	0	0	0	7.30029e-05	0	0	0
k__Bacteria;p__Firmicutes;c__Bacilli;o__Lactobacillales;f__Carnobacteriaceae;g__Desemzia	0	0	0	0	6.26025e-05	0	0	0
k__Bacteria;p__Actinobacteria;c__Actinobacteria;o__Actinomycetales;f__Microbacteriaceae;g__Pseudoclavibacter	0	0	0	0	1.04004e-05	0	0	0
k__Bacteria;p__Proteobacteria;c__Deltaproteobacteria;o__Myxococcales;f__;g__	0	0	0	0	8.00032e-06	0	0	0
k__Bacteria;p__Bacteroidetes;c__Cytophagia;o__Cytophagales;f__Cytophagaceae;g__Flectobacillus	0	0	0	0	5.60022e-06	0	0	0
k__Bacteria;p__Proteobacteria;c__Gammaproteobacteria;o__Enterobacteriales;f__Enterobacteriaceae;g__Morganella	0	0	0	0	5.60022e-06	0	0	0
k__Bacteria;p__Firmicutes;c__Clostridia;o__Clostridiales;f__Lachnospiraceae;g__Clostridium	0	0	1.20002e-05	0	5.0002e-06	0	0	0
k__Bacteria;p__Proteobacteria;c__Betaproteobacteria;o__Burkholderiales;f__Alcaligenaceae;g__	0	0	8.80013e-06	0	3.00012e-06	0	0	0
k__Bacteria;p__Proteobacteria;c__Betaproteobacteria;o__Burkholderiales;f__Oxalobacteraceae;g__	0	0	9.60015e-06	0	1.80007e-06	0	0	0
k__Bacteria;p__Proteobacteria;c__Gammaproteobacteria;o__Xanthomonadales;f__Xanthomonadaceae;Other	0	0	3.22005e-05	0	1.40006e-06	0	0	0
k__Bacteria;p__Chloroflexi;c__Thermomicrobia;o__JG30-KF-CM45;f__;g__	0	0	9.60015e-06	0	0	0	0	0
k__Bacteria;p__Firmicutes;c__Bacilli;o__Lactobacillales;f__Leuconostocaceae;g__Leuconostoc	0	0	7.80012e-06	0	0	0	0	0

## Sheet: Sheet2
Genus	B0	EM0	B10	EM10	B20	EM20	E	B20C	EM20C
k__Bacteria;p__Firmicutes;c__Bacilli;o__Lactobacillales;f__Lactobacillaceae;g__Lactobacillus	0.747633	0.780281	0.509112	0.468996	0.332629	0.485029	0.553947	0.017875	0.0253862
k__Bacteria;p__Firmicutes;c__Bacilli;o__Lactobacillales;f__Streptococcaceae;g__Streptococcus	0.000116	0.000291001	0.190748	0.105423	0.0642608	0.0522291	0.0688445	0.0185711	0.00374017
k__Bacteria;p__Firmicutes;c__Bacilli;o__Lactobacillales;f__Enterococcaceae;g__Enterococcus	0.0015968	0.00289341	0.114228	0.209412	0.0185915	0.0260432	0.0621274	0.00103275	0.000258198
k__Bacteria;p__Proteobacteria;c__Gammaproteobacteria;o__Enterobacteriales;f__Enterobacteriaceae;g__	0.0571913	0.010984	0.0106132	0.0365163	0.184999	0.0676606	0.0613273	0.00021239	0.000131599
k__Bacteria;p__Firmicutes;c__Clostridia;o__Clostridiales;f__Lachnospiraceae;g__[Ruminococcus]	0.0561423	0.0486477	0.0262258	0.0228502	0.0556938	0.0368698	0.0410716	0.364077	0.240198
k__Bacteria;p__Firmicutes;c__Clostridia;o__Clostridiales;f__;g__	0.0269855	0.0307889	0.0229941	0.014082	0.0539726	0.0520747	0.033483	0.234006	0.20317
k__Bacteria;p__Bacteroidetes;c__Bacteroidia;o__Bacteroidales;f__Bacteroidaceae;g__Bacteroides	0.00829638	0.0144946	0.0292514	0.00459072	0.0526799	0.0479465	0.0262099	0.018139	0.00906953
k__Bacteria;p__Firmicutes;c__Bacilli;o__Lactobacillales;f__Enterococcaceae;Other	0.0002332	0.000227601	0.00229463	0.0103531	0.0137654	0.0343314	0.0102009	1.59993e-06	5.79996e-06
k__Bacteria;p__Proteobacteria;c__Epsilonproteobacteria;o__Campylobacterales;f__Helicobacteraceae;g__	0.000126	0.000431001	0.00305645	0.00185025	0.0206534	0.0335162	0.00993889	7.59965e-06	2.41998e-05
k__Bacteria;p__Firmicutes;c__Clostridia;o__Clostridiales;f__Ruminococcaceae;g__Faecalibacterium	0.0272555	0.0126894	0.00261724	0.00206045	0.00404396	0.00344358	0.00868504	0.00332825	0.00556616
k__Bacteria;p__Cyanobacteria;c__Chloroplast;o__Streptophyta;f__;g__	0.00352759	0.0100746	0.0193271	0.0159544	0.00126765	0.000857395	0.00850146	0	6.31995e-05
k__Bacteria;p__Firmicutes;c__Clostridia;o__Clostridiales;f__Ruminococcaceae;g__Oscillospira	0.00786158	0.00620822	0.00525328	0.00462272	0.0136219	0.00966354	0.00787188	0.0172736	0.0189381
k__Bacteria;p__Bacteroidetes;c__Bacteroidia;o__Bacteroidales;f__Rikenellaceae;g__	0.00544819	0.0265913	0.00263524	0.00101063	0.004925	0.00144919	0.00700992	0.000457379	0.000322598
k__Bacteria;p__Proteobacteria;c__Gammaproteobacteria;o__Pasteurellales;f__Pasteurellaceae;g__Gallibacterium	0	0	0.000127602	0.0368041	0.00382195	0.000603796	0.00689292	6.11972e-05	1.11999e-05
k__Bacteria;p__Firmicutes;c__Clostridia;o__Clostridiales;f__Clostridiaceae;g__Candidatus	0.00490099	0.000177392	0.00490099	0.00260321	0.00108242	0.0219488	0.00593563	0.00828133	0.0173399
k__Bacteria;p__Firmicutes;c__Clostridia;o__Clostridiales;f__Lachnospiraceae;g__	0.00259679	0.00782502	0.00518248	0.00272607	0.0119393	0.00503717	0.00588447	0.0729752	0.0649667
Unassigned	0.000568399	0.000986003	0.000768612	0.00040081	0.00698168	0.0232883	0.00549896	0.00516656	0.00243458
k__Bacteria;p__Firmicutes;c__Clostridia;o__Clostridiales;f__Veillonellaceae;g__	0.00313099	0.001532	0.00425206	0.000721019	0.0117137	0.0105307	0.00531341	0.00110315	0.000934793
k__Bacteria;p__Firmicutes;c__Clostridia;o__Clostridiales;f__Ruminococcaceae;g__Ruminococcus	0.00868498	0.00518361	0.00239784	0.000967025	0.0073881	0.00408078	0.00478372	0.0282417	0.0462987
k__Bacteria;p__Tenericutes;c__Mollicutes;o__RF39;f__;g__	0.0128068	0.00293341	0.00344665	0.00135884	0.00319513	0.000573997	0.00405247	0.00847061	0.00571816
k__Bacteria;p__Proteobacteria;c__Deltaproteobacteria;o__Desulfovibrionales;f__Desulfovibrionaceae;g__Desulfovibrio	0	9.80003e-05	0.00235404	0.00263347	0.00875255	0.0102849	0.0040205	0.00194671	0.00382737
k__Bacteria;p__Synergistetes;c__Synergistia;o__Synergistales;f__Synergistaceae;g__	0	5.56002e-05	0.00137002	0.00039081	0.0122711	0.00905695	0.00385741	0.00531056	0.0159473
k__Bacteria;p__Firmicutes;c__Clostridia;o__Clostridiales;f__Veillonellaceae;g__Megamonas	0.00645799	0.0116686	0.00224243	0.000466812	0.000661226	0.00141499	0.00381868	1.65992e-05	0.000484396
k__Bacteria;p__Firmicutes;c__Clostridia;o__Clostridiales;f__Lachnospiraceae;g__Dorea	0.002352	0.00460221	0.00361805	0.00323728	0.00415737	0.00168759	0.00327575	0.030628	0.0204618
k__Bacteria;p__Bacteroidetes;c__Bacteroidia;o__Bacteroidales;f__Porphyromonadaceae;g__Parabacteroides	0.0016962	0.00257981	0.00179503	0.000812421	0.00686207	0.00253578	0.00271355	0.00499497	0.00478116
k__Bacteria;p__Proteobacteria;c__Gammaproteobacteria;o__Pseudomonadales;f__Moraxellaceae;g__Acinetobacter	0.000252199	2.02001e-05	2.24003e-05	0.000527614	0.0113871	0.00219679	0.00240104	1.59993e-06	3.19998e-06
k__Bacteria;p__Proteobacteria;c__Alphaproteobacteria;o__Rickettsiales;f__mitochondria;Other	0.001381	0.0016614	0.00197603	0.00313468	0.00174847	0.00368138	0.00226383	0	5.99996e-06
k__Archaea;p__Euryarchaeota;c__Methanobacteria;o__Methanobacteriales;f__Methanobacteriaceae;g__Methanobrevibacter	2.79999e-06	1.4e-06	0.00439367	0.00420031	0.00183047	0.00286898	0.00221627	0.00951176	0.00296818
k__Bacteria;p__Firmicutes;c__Erysipelotrichi;o__Erysipelotrichales;f__Erysipelotrichaceae;g__	0.00573359	0.00228241	0.00132322	0.000853022	0.00272211	0.000261398	0.00219596	0.00668309	0.0123619
k__Bacteria;p__Actinobacteria;c__Coriobacteriia;o__Coriobacteriales;f__Coriobacteriaceae;g__	4.79999e-05	0.0001744	0.00113242	0.00127223	0.00530261	0.00391138	0.00197351	0.00562354	0.134259
k__Bacteria;p__Cyanobacteria;c__4C0d-2;o__YS2;f__;g__	0.000463399	0.000387401	0.00252604	0.000828621	0.00377195	0.00199019	0.00166127	0.0106187	0.0175895
k__Bacteria;p__Firmicutes;c__Clostridia;o__Clostridiales;f__Veillonellaceae;g__Veillonella	1.76e-05	1.78e-05	0.00373346	7.36019e-05	0.00569763	0.000134399	0.00161241	8.57961e-05	2.25998e-05
k__Bacteria;p__Bacteroidetes;c__Bacteroidia;o__Bacteroidales;f__;g__	0	0	8.50013e-05	0.000643817	0.0049404	0.00392578	0.00159917	0.000476378	0.00191799
k__Bacteria;p__Firmicutes;c__Clostridia;o__Clostridiales;f__Lachnospiraceae;g__Blautia	0.000523399	0.00268561	0.000810412	0.000913824	0.00353214	0.000888195	0.00155893	0.033917	0.0150411
k__Bacteria;p__Firmicutes;c__Clostridia;o__Clostridiales;f__Lachnospiraceae;g__Coprococcus	0.000382599	0.0012634	0.000906414	0.00115583	0.00403476	0.00124459	0.00149793	0.0310384	0.0269028
k__Bacteria;p__Verrucomicrobia;c__Verruco-5;o__WCHB1-41;f__RFP12;g__	0	0	0	1.72004e-05	0.00678887	0.00142859	0.00137244	0.00262128	0.00179659
k__Bacteria;p__Fusobacteria;c__Fusobacteriia;o__Fusobacteriales;f__Fusobacteriaceae;g__Fusobacterium	3.73999e-05	6.00002e-06	0.000138002	0.000210805	6.44026e-05	0.00601596	0.00107876	0.000102395	1.13999e-05
k__Bacteria;p__Proteobacteria;c__Betaproteobacteria;o__Burkholderiales;f__Alcaligenaceae;g__Sutterella	0.000425999	7.20002e-05	0.00103142	0.000489613	0.00188188	0.00219839	0.00101655	0.000470578	0.000362597
k__Bacteria;p__Firmicutes;c__Clostridia;o__Clostridiales;f__Lachnospiraceae;Other	0.0001614	0.000654002	0.00151162	0.00101063	0.00147046	0.00102239	0.000971751	0.00849101	0.00807154
k__Bacteria;p__WPS-2;c__;o__;f__;g__	0	0	0	0.00112743	0.00023981	0.00399318	0.000893402	2.99986e-06	0.00742555
k__Bacteria;p__Bacteroidetes;c__Bacteroidia;o__Bacteroidales;f__Prevotellaceae;g__Prevotella	4.53999e-05	8.50002e-05	0.000701211	0.000326408	0.00275511	0.00137399	0.000881187	0.000183792	0.000241998
k__Bacteria;p__Firmicutes;c__Clostridia;o__Clostridiales;f__Christensenellaceae;g__	5.51999e-05	0.000268201	0.000355805	0.000422411	0.00173327	0.00160759	0.000740413	0.0100199	0.00610695
k__Bacteria;p__Proteobacteria;c__Alphaproteobacteria;o__RF32;f__;g__	0.000305799	1.78e-05	6.8601e-05	3.7201e-05	0.0026059	0.000877995	0.000652217	0.000540175	0.000891393
k__Bacteria;p__Firmicutes;c__Bacilli;o__Bacillales;f__Planococcaceae;g__Rummeliibacillus	0	0	0.000127002	0.00107903	0.00190328	0.000746596	0.00064265	0	0
k__Bacteria;p__Bacteroidetes;c__Bacteroidia;o__Bacteroidales;f__[Odoribacteraceae];g__Odoribacter	0.0002046	0.0001478	0.000279204	0.000100603	0.00220309	0.000750595	0.000614315	0.000525776	0.000194799
k__Bacteria;p__Firmicutes;c__Clostridia;o__Clostridiales;f__Dehalobacteriaceae;g__Dehalobacterium	7.81998e-05	6.50002e-05	0.000564409	0.00039021	0.00143586	0.000735396	0.000544845	0.004381	0.0100505
k__Bacteria;p__Proteobacteria;c__Gammaproteobacteria;o__Enterobacteriales;f__Enterobacteriaceae;Other	7.01999e-05	0.0001436	0.000605409	0.000964425	0.00110224	0.000178399	0.000510713	0	9.39993e-06
k__Bacteria;p__Firmicutes;c__Clostridia;o__Clostridiales;Other;Other	0.000432599	0.000541402	0.000152002	0.00037981	0.00112685	0.000151599	0.000464043	0.00354364	0.00182299
k__Bacteria;p__Bacteroidetes;c__Bacteroidia;o__Bacteroidales;f__[Barnesiellaceae];g__	0.000127	0.000703602	0.000337405	0.000179005	0.000585423	0.000593396	0.000420972	0.00145473	0.000155799
k__Bacteria;p__Firmicutes;c__Clostridia;o__Clostridiales;f__[Mogibacteriaceae];g__	0.0001582	0.000201801	0.00065021	0.000289607	0.000779631	0.000438997	0.000419741	0.00155173	0.00222418
k__Bacteria;p__Firmicutes;c__Clostridia;o__Clostridiales;f__Clostridiaceae;g__Clostridium	0	2.44001e-05	9.20014e-06	5.52014e-05	0.000690828	0.00170839	0.00041467	0.00711267	0.0219976
k__Bacteria;p__Elusimicrobia;c__Elusimicrobia;o__Elusimicrobiales;f__Elusimicrobiaceae;g__	0	0	0.00068581	1.64004e-05	0.000205208	0.00153279	0.000406702	1.59993e-06	0.000428597
k__Bacteria;p__Firmicutes;c__Erysipelotrichi;o__Erysipelotrichales;f__Erysipelotrichaceae;g__Coprobacillus	0.000565399	0.000752402	0.000270804	0.000183805	0.000554822	6.51996e-05	0.000398739	0.0022635	0.00335138
k__Bacteria;p__Firmicutes;c__Erysipelotrichi;o__Erysipelotrichales;f__Erysipelotrichaceae;g__cc_115	0.000738199	0.000425601	0.000382406	0.000472212	0.000277811	7.15996e-05	0.000394638	0.00205171	0.00238358
k__Bacteria;p__TM7;c__TM7-3;o__CW040;f__F16;g__	0	0	0.000949414	0.000342209	0.000986639	8.75995e-05	0.00039431	0.00258028	0.000600596
k__Bacteria;p__Firmicutes;c__Clostridia;o__Clostridiales;f__Clostridiaceae;g__	4.45999e-05	0.000299801	0.000534608	0.000189805	0.000516621	0.000695596	0.000380172	0.00322405	0.00390677
k__Bacteria;p__Actinobacteria;c__Actinobacteria;o__Bifidobacteriales;f__Bifidobacteriaceae;g__Bifidobacterium	0.000393599	0.0001338	0.00124042	0.000239806	8.26033e-05	1.93999e-05	0.000351605	0.000423181	0.000475196
k__Bacteria;p__Bacteroidetes;c__Bacteroidia;o__Bacteroidales;f__[Paraprevotellaceae];g__	0	0	0.000116202	9.24024e-05	0.000954238	0.000833195	0.000332673	0.00066117	0.000236598
k__Bacteria;p__TM7;c__TM7-3;o__I025;f__Rs-045;g__	0	0	7.66012e-05	0.00076542	0.000924237	0.000127799	0.000315676	0.00129914	0.000242198
k__Bacteria;p__Bacteroidetes;c__Bacteroidia;o__Bacteroidales;f__S24-7;g__	0	0	7.46011e-05	3.04008e-05	0.000934437	0.000798595	0.000306339	2.2599e-05	0.000116199
k__Bacteria;p__Verrucomicrobia;c__Verrucomicrobiae;o__Verrucomicrobiales;f__Verrucomicrobiaceae;g__Akkermansia	1.4e-06	1.54e-05	0.000178203	0.000122803	0.000512821	0.000971394	0.000300337	4.81978e-05	0.0287018
k__Bacteria;p__Proteobacteria;c__Epsilonproteobacteria;o__Campylobacterales;f__Helicobacteraceae;g__Helicobacter	0.000413999	0.000147	0.000358605	0.000312008	0.000205808	0.000250998	0.000281403	0.000590773	0.000149399
k__Bacteria;p__Firmicutes;c__Clostridia;o__Clostridiales;f__Peptococcaceae;g__Peptococcus	0	0	0.000115402	0.000480012	0.000637826	0.000442197	0.000279239	0.00129414	0.00416017
k__Bacteria;p__Proteobacteria;c__Alphaproteobacteria;o__;f__;g__	0	1.4e-06	3.44005e-05	5.26014e-05	0.000320213	0.00123879	0.000274568	0.000963756	0.000696395
k__Bacteria;p__Firmicutes;c__Bacilli;o__Turicibacterales;f__Turicibacteraceae;g__Turicibacter	0	9.80003e-05	0	2.10005e-05	0.000697828	0.000822795	0.000273271	0	3.59997e-06
k__Bacteria;p__Spirochaetes;c__Spirochaetes;o__Sphaerochaetales;f__Sphaerochaetaceae;g__Sphaerochaeta	0	0	1.14002e-05	3.22008e-05	0.00148626	8.27995e-05	0.000268777	0.000153193	0.000304798
k__Bacteria;p__Firmicutes;c__Clostridia;o__Clostridiales;f__Dehalobacteriaceae;g__	4.25999e-05	0.000526601	0.000445407	0.000211605	0.000289012	5.37997e-05	0.000261504	0.00275167	0.00149359
k__Bacteria;p__Firmicutes;c__Bacilli;o__Bacillales;f__Planococcaceae;g__Solibacillus	0	0	1.08002e-05	1.30003e-05	0.000280211	0.00115879	0.000243801	0	0
k__Bacteria;p__Proteobacteria;c__Epsilonproteobacteria;o__Campylobacterales;f__Campylobacteraceae;g__Campylobacter	0	0	0.000255604	0.000340209	0.000352414	0.000372198	0.000220071	0.000933957	0.000970993
k__Bacteria;p__Actinobacteria;c__Actinobacteria;o__Actinomycetales;f__Corynebacteriaceae;g__Corynebacterium	3.29999e-05	3.14001e-05	5.60009e-06	0.000103003	0.00074303	0.000352598	0.000211438	0	0
k__Bacteria;p__Bacteroidetes;c__Bacteroidia;o__Bacteroidales;f__[Barnesiellaceae];Other	0	0	0	3.20008e-06	0.00108524	1.39999e-06	0.000181641	0	1.99999e-06
k__Bacteria;p__Firmicutes;c__Bacilli;o__Lactobacillales;f__Aerococcaceae;g__Aerococcus	0	0	0	0	0.000775631	0.000265598	0.000173538	0	0
k__Bacteria;p__Proteobacteria;c__Deltaproteobacteria;o__Desulfovibrionales;f__Desulfovibrionaceae;g__	5.61999e-05	9.20003e-06	4.68007e-05	7.14018e-05	0.000640226	0.000214799	0.000173104	0.00021139	0.000136799
k__Bacteria;p__Firmicutes;c__Bacilli;o__Bacillales;f__Paenibacillaceae;g__Paenibacillus	0	0	3.40005e-06	5.50014e-05	2.70011e-05	0.000937594	0.000170499	0	0
k__Bacteria;p__Tenericutes;c__Mollicutes;o__Mycoplasmatales;f__Mycoplasmataceae;g__	0	0	9.60015e-06	0.000115603	0.000625625	0.000230199	0.000163504	0	1.59999e-06
k__Bacteria;p__Firmicutes;c__Clostridia;o__Clostridiales;f__Clostridiaceae;g__SMB53	0	0	0	0	2.12008e-05	0.000940594	0.000160299	0	0
k__Archaea;p__Euryarchaeota;c__Methanomicrobia;o__Methanomicrobiales;f__Methanocorpusculaceae;g__Methanocorpusculum	0	0	0.000624409	3.34009e-05	4.64019e-05	0.000191999	0.000149369	0	0.000351397
k__Bacteria;p__Firmicutes;c__Bacilli;o__Bacillales;f__Planococcaceae;g__Lysinibacillus	2.53999e-05	2.66001e-05	0.000161002	0.000345809	0.000138806	0.000136199	0.000138969	4.59979e-06	1.87999e-05
k__Bacteria;p__Firmicutes;c__Bacilli;o__Bacillales;f__Bacillaceae;g__Bacillus	0.0002324	1.92001e-05	4.06006e-05	0.000243606	4.06016e-05	0.000239399	0.000135968	0	0
k__Bacteria;p__Deferribacteres;c__Deferribacteres;o__Deferribacterales;f__Deferribacteraceae;g__Mucispirillum	0	0	6.7001e-05	0.000143204	0.000324413	0.000280598	0.000135869	0.000752565	0.000430197
k__Bacteria;p__Firmicutes;c__Clostridia;o__Clostridiales;f__Lachnospiraceae;g__Lachnospira	4.39999e-06	0.0001678	0.000526208	8.20021e-05	1.62006e-05	2.99998e-06	0.000133269	0	1.29999e-05
k__Bacteria;p__Firmicutes;c__Bacilli;o__Lactobacillales;f__Streptococcaceae;g__Lactococcus	0	1.04e-05	6.8001e-06	0.000549014	0.000125205	6.79996e-05	0.00012657	3.19985e-06	0
k__Bacteria;p__Proteobacteria;c__Betaproteobacteria;o__Burkholderiales;f__Comamonadaceae;Other	3.47999e-05	2.04001e-05	0.000192003	0.000206405	0.000104804	0.000170999	0.000121569	0	0
k__Bacteria;p__Actinobacteria;c__Actinobacteria;o__Actinomycetales;f__Micrococcaceae;Other	3.57999e-05	0.0001774	9.10014e-05	0.000252007	0.000140806	2.95998e-05	0.000121102	0	2.05998e-05
k__Bacteria;p__Actinobacteria;c__Actinobacteria;o__Actinomycetales;f__Micrococcaceae;g__Arthrobacter	0	0	1.40002e-06	9.80025e-06	0.000648226	3.73998e-05	0.000116138	0	0
k__Bacteria;p__Proteobacteria;c__Gammaproteobacteria;o__Aeromonadales;f__Succinivibrionaceae;g__	0	0	9.20014e-06	2.24006e-05	0.000196408	0.000452797	0.000113468	5.99972e-06	2.59998e-05
k__Bacteria;p__Bacteroidetes;c__Bacteroidia;o__Bacteroidales;f__Rikenellaceae;g__Rikenella	0	3.32001e-05	0.000101402	8.28021e-05	0.000368215	4.89997e-05	0.00010577	0.00020899	2.41998e-05
k__Bacteria;p__Proteobacteria;c__Deltaproteobacteria;o__Desulfovibrionales;f__Desulfovibrionaceae;g__Bilophila	0	5.32001e-05	0.000209403	1.80005e-05	0.000268411	7.51995e-05	0.000104036	0.000121594	5.09996e-05
k__Bacteria;p__Bacteroidetes;c__Bacteroidia;o__Bacteroidales;f__[Paraprevotellaceae];g__Paraprevotella	2.32e-05	4.60001e-06	0	1.38004e-05	1.08004e-05	0.000511797	9.40329e-05	0	2.65998e-05
k__Bacteria;p__Firmicutes;c__Bacilli;o__Bacillales;f__Staphylococcaceae;g__Jeotgalicoccus	0	4.40001e-06	0	0	0.000517621	1.35999e-05	8.92701e-05	0	0
k__Bacteria;p__Firmicutes;c__Erysipelotrichi;o__Erysipelotrichales;f__Erysipelotrichaceae;g__Holdemania	4.59999e-06	1.22e-05	0.000132602	0.000189805	0.000110804	5.05997e-05	8.34352e-05	0.000953556	0.000653795
k__Bacteria;p__Firmicutes;c__Bacilli;o__Bacillales;f__Staphylococcaceae;g__Staphylococcus	3.89999e-05	5.00001e-05	3.80006e-05	4.82012e-05	0.00023781	3.13998e-05	7.40685e-05	0	1.59999e-06
k__Bacteria;p__Lentisphaerae;c__[Lentisphaeria];o__Victivallales;f__Victivallaceae;g__	6.09999e-05	4.60001e-06	3.00005e-05	1.06003e-05	0.000230209	0.000103399	7.33015e-05	9.75955e-05	6.15995e-05
k__Bacteria;p__Proteobacteria;c__Betaproteobacteria;o__Burkholderiales;f__Oxalobacteraceae;g__Ralstonia	7.85998e-05	1.96001e-05	5.62009e-05	0.000192205	3.24013e-05	5.59997e-05	7.25011e-05	1.05995e-05	1.89999e-05
k__Bacteria;p__Verrucomicrobia;c__Opitutae;o__[Cerasicoccales];f__[Cerasicoccaceae];g__	0	0	4.38007e-05	1.26003e-05	9.80039e-05	0.000257398	6.86339e-05	0.000158793	0.000383797
k__Bacteria;p__Actinobacteria;c__Coriobacteriia;o__Coriobacteriales;f__Coriobacteriaceae;g__Adlercreutzia	0	0	1.80003e-06	2.44006e-05	0.000172407	0.000202399	6.68344e-05	0.00133474	0.00197919
k__Bacteria;p__Firmicutes;c__Clostridia;o__Clostridiales;f__Lachnospiraceae;g__Anaerostipes	0	4.40001e-06	9.80015e-05	3.28008e-05	0.000195408	6.39996e-05	6.57683e-05	0.00107115	0.000342397
k__Bacteria;p__[Thermi];c__Deinococci;o__Thermales;f__Thermaceae;g__Meiothermus	2.02e-05	1.32e-05	2.92004e-05	0.000162004	8.10032e-05	2.67998e-05	5.54013e-05	2.99986e-06	1.11999e-05
k__Bacteria;p__Actinobacteria;c__Actinobacteria;o__Actinomycetales;f__Micrococcaceae;g__Rothia	3.33999e-05	3.00001e-06	0.000139402	0.000104603	4.86019e-05	0	5.48345e-05	0	0
k__Bacteria;p__Actinobacteria;c__Coriobacteriia;o__Coriobacteriales;f__Coriobacteriaceae;g__Eggerthella	1.4e-06	0.000224201	7.22011e-05	1.46004e-05	4.00016e-06	5.99996e-06	5.37337e-05	0.000407181	1.45999e-05
k__Bacteria;p__Firmicutes;c__Clostridia;o__Clostridiales;f__Christensenellaceae;g__Christensenella	0	3.66001e-05	2.78004e-05	2.94008e-05	0.000168607	4.27997e-05	5.0868e-05	0.000583173	0.000520996
k__Bacteria;p__Proteobacteria;c__Gammaproteobacteria;o__Enterobacteriales;f__Enterobacteriaceae;g__Escherichia	0.000276399	0	0	0	5.40022e-06	5.99996e-06	4.79666e-05	0	0
k__Bacteria;p__Actinobacteria;c__Coriobacteriia;o__Coriobacteriales;f__Coriobacteriaceae;g__Slackia	1.16e-05	9.00003e-06	9.20014e-06	3.8801e-05	0.000172407	3.59998e-05	4.6168e-05	0.000414381	0.000119399
k__Bacteria;p__Firmicutes;c__Bacilli;o__Bacillales;f__Staphylococcaceae;g__Macrococcus	0	0	0.000109002	3.46009e-05	0.000120405	7.39996e-06	4.52346e-05	0	0
k__Archaea;p__Euryarchaeota;c__Thermoplasmata;o__E2;f__[Methanomassiliicoccaceae];g__vadinCA11	0	0	7.18011e-05	0	7.90032e-05	0.000104599	4.25673e-05	2.55988e-05	0.000163999
k__Bacteria;p__Firmicutes;c__Clostridia;o__Clostridiales;f__Ruminococcaceae;g__Anaerotruncus	1.78e-05	2.40001e-05	3.30005e-05	7.40019e-06	0.000111004	5.73997e-05	4.17675e-05	0.000302586	0.000418797
k__Bacteria;p__Firmicutes;c__Bacilli;o__Lactobacillales;f__Carnobacteriaceae;g__Trichococcus	1.4e-06	0	0	0	9.06036e-05	0.000141999	3.90005e-05	0	0
k__Bacteria;p__Firmicutes;c__Erysipelotrichi;o__Erysipelotrichales;f__Erysipelotrichaceae;g__[Eubacterium]	8.51998e-05	7.56002e-05	3.54005e-05	1.72004e-05	1.84007e-05	1.59999e-06	3.89003e-05	3.19985e-06	3.93997e-05
k__Bacteria;p__Firmicutes;c__Clostridia;o__Clostridiales;f__Peptostreptococcaceae;g__	0	0	6.8001e-06	3.40009e-05	0.000113205	6.45996e-05	3.64342e-05	0	1.59999e-06
k__Bacteria;p__Proteobacteria;c__Gammaproteobacteria;o__Pasteurellales;f__Pasteurellaceae;g__Avibacterium	2.4e-06	0	1.70003e-05	0.000187405	6.00024e-06	2.99998e-06	3.59676e-05	0	0
k__Bacteria;p__Firmicutes;c__Bacilli;o__Bacillales;f__Bacillaceae;g__	0	3.00001e-06	1.18002e-05	5.26014e-05	6.22025e-05	8.45995e-05	3.57006e-05	0	0
k__Bacteria;p__Bacteroidetes;c__Bacteroidia;o__Bacteroidales;f__[Odoribacteraceae];g__Butyricimonas	0	0	8.38013e-05	2.24006e-05	6.54026e-05	2.81998e-05	3.33007e-05	5.99972e-06	7.99994e-06
k__Bacteria;p__Proteobacteria;c__Gammaproteobacteria;o__Pseudomonadales;f__Pseudomonadaceae;g__Pseudomonas	1.4e-06	6.00002e-06	2.36004e-05	7.42019e-05	1.06004e-05	6.35996e-05	2.99004e-05	0	3.19998e-06
k__Bacteria;p__Firmicutes;c__Clostridia;o__Clostridiales;f__Veillonellaceae;g__Phascolarctobacterium	8.59998e-06	1.48e-05	6.9001e-05	7.7602e-05	6.20025e-06	1.59999e-06	2.96339e-05	0	0
k__Bacteria;p__Firmicutes;c__Clostridia;o__Clostridiales;f__Veillonellaceae;g__Megasphaera	0	0	0	6.20016e-06	9.00036e-06	0.000154199	2.82333e-05	0	1.59999e-06
k__Bacteria;p__Proteobacteria;c__Betaproteobacteria;o__Burkholderiales;f__Oxalobacteraceae;g__Oxalobacter	0	3.00001e-06	9.00014e-06	1.60004e-06	6.26025e-05	8.89995e-05	2.75337e-05	4.59979e-06	3.39997e-06
k__Bacteria;p__Firmicutes;c__Erysipelotrichi;o__Erysipelotrichales;f__Erysipelotrichaceae;Other	0	1.34e-05	5.32008e-05	7.8402e-05	1.78007e-05	0	2.71339e-05	3.61983e-05	0
k__Bacteria;p__Firmicutes;c__Bacilli;o__Lactobacillales;f__Lactobacillaceae;g__Pediococcus	0	0.0001416	4.40007e-06	4.80012e-06	8.00032e-06	0	2.64668e-05	0	0
k__Bacteria;p__Actinobacteria;c__Actinobacteria;o__Actinomycetales;f__Microbacteriaceae;g__Microbacterium	0	0	7.26011e-05	3.8801e-05	2.28009e-05	1.81999e-05	2.54005e-05	0	1.59999e-06
k__Bacteria;p__Proteobacteria;c__Gammaproteobacteria;o__Enterobacteriales;f__Enterobacteriaceae;g__Proteus	1.42e-05	1.02e-05	2.32004e-05	9.58025e-05	4.40018e-06	0	2.46338e-05	0	0
k__Bacteria;p__Firmicutes;c__Bacilli;o__Lactobacillales;f__Leuconostocaceae;g__	0	0.0001082	0	1.12003e-05	2.00008e-05	4.39997e-06	2.39669e-05	2.99986e-06	0
k__Bacteria;p__Firmicutes;c__Bacilli;o__Bacillales;f__Planococcaceae;g__Sporosarcina	0	4.40001e-06	2.20003e-05	0	8.32033e-05	2.71998e-05	2.28006e-05	0	0
k__Bacteria;p__Bacteroidetes;c__Bacteroidia;o__Bacteroidales;f__BS11;g__	0	0	0	3.40009e-06	9.72039e-05	2.85998e-05	2.1534e-05	9.15958e-05	9.61993e-05
k__Bacteria;p__Proteobacteria;c__Gammaproteobacteria;o__Xanthomonadales;f__Xanthomonadaceae;g__Stenotrophomonas	0	3.00001e-06	9.98015e-05	1.84005e-05	6.60026e-06	0	2.13004e-05	0	0
k__Bacteria;p__Firmicutes;c__Clostridia;o__SHA-98;f__;g__	0	0	8.80013e-06	0	3.00012e-05	8.59995e-05	2.08001e-05	7.59965e-06	1.27999e-05
k__Bacteria;p__TM7;c__TM7-3;o__;f__;g__	0	0	0	9.02023e-05	1.44006e-05	1.77999e-05	2.04005e-05	0	0
k__Bacteria;p__Proteobacteria;c__Alphaproteobacteria;o__Rhizobiales;f__Brucellaceae;g__Ochrobactrum	0	1.4e-06	0	9.24024e-05	1.80007e-06	2.33999e-05	1.98337e-05	0	4.99996e-06
k__Bacteria;p__Proteobacteria;c__Betaproteobacteria;o__Burkholderiales;f__Comamonadaceae;g__Comamonas	0	0	0	2.00005e-06	3.24013e-05	7.83995e-05	1.88001e-05	0	0
k__Bacteria;p__Proteobacteria;c__Gammaproteobacteria;o__Enterobacteriales;f__Enterobacteriaceae;g__Erwinia	0.0001122	0	0	0	0	0	1.87e-05	0	0
k__Bacteria;p__Proteobacteria;c__Betaproteobacteria;o__Rhodocyclales;f__Rhodocyclaceae;g__Hydrogenophilus	0	3.00001e-06	1.80003e-05	2.88007e-05	4.00016e-05	1.65999e-05	1.77338e-05	1.59993e-06	1.59999e-06
k__Bacteria;p__Proteobacteria;c__Alphaproteobacteria;o__Rhizobiales;f__Rhizobiaceae;g__Agrobacterium	0	4.20001e-06	5.80009e-06	6.60017e-05	3.80015e-06	2.55998e-05	1.7567e-05	0	0
k__Bacteria;p__Bacteroidetes;c__Bacteroidia;o__Bacteroidales;f__Rikenellaceae;Other	0	0.0001042	0	0	0	0	1.73667e-05	0	0
k__Bacteria;p__Proteobacteria;c__Betaproteobacteria;o__Burkholderiales;f__Oxalobacteraceae;g__Cupriavidus	0	4.60001e-06	9.60015e-06	6.52017e-05	1.98008e-05	4.39997e-06	1.72671e-05	0	0
k__Bacteria;p__[Thermi];c__Deinococci;o__Deinococcales;f__Deinococcaceae;g__Deinococcus	0	0	1.80003e-06	4.20011e-06	2.28009e-05	6.23996e-05	1.52001e-05	0	0
k__Bacteria;p__Proteobacteria;c__Alphaproteobacteria;o__Caulobacterales;f__Caulobacteraceae;g__	0	0	7.60012e-06	3.9001e-05	2.00008e-05	7.59995e-06	1.2367e-05	0	0
k__Bacteria;p__Actinobacteria;c__Actinobacteria;o__Actinomycetales;f__Jonesiaceae;Other	0	0	0	0	7.30029e-05	0	1.21672e-05	0	0
k__Bacteria;p__Proteobacteria;c__Betaproteobacteria;o__Burkholderiales;f__Comamonadaceae;g__	0	0	2.00003e-06	4.42011e-05	1.88008e-05	7.39996e-06	1.2067e-05	0	0
k__Bacteria;p__Firmicutes;c__Clostridia;o__Clostridiales;f__Clostridiaceae;Other	0	0	0	1.40004e-06	1.10004e-05	5.59997e-05	1.14e-05	0	0
k__Bacteria;p__Actinobacteria;c__Actinobacteria;o__Actinomycetales;f__Microbacteriaceae;g__Curtobacterium	0	0	4.80007e-06	5.12013e-05	3.00012e-06	8.99995e-06	1.13336e-05	0	0
k__Bacteria;p__Bacteroidetes;c__Bacteroidia;o__Bacteroidales;f__Porphyromonadaceae;g__Tannerella	0	0	0	0	5.40022e-06	6.15996e-05	1.11666e-05	0	3.39997e-06
k__Bacteria;p__Firmicutes;c__Clostridia;o__Clostridiales;f__Lachnospiraceae;g__Roseburia	4.59999e-06	3.00001e-06	0	3.20008e-05	2.72011e-05	0	1.11337e-05	0	0
k__Bacteria;p__Actinobacteria;c__Actinobacteria;o__Actinomycetales;f__Microbacteriaceae;g__Leucobacter	0	0	0	0	6.16025e-05	4.59997e-06	1.10337e-05	0	0
k__Bacteria;p__Firmicutes;c__Clostridia;o__Clostridiales;f__Eubacteriaceae;g__Anaerofustis	0	0	3.80006e-06	0	5.24021e-05	8.99995e-06	1.0867e-05	0.000265988	5.29996e-05
k__Bacteria;p__Actinobacteria;c__Actinobacteria;o__Actinomycetales;f__Propionibacteriaceae;g__Propionibacterium	0	0	1.48002e-05	4.84012e-05	0	0	1.05336e-05	0	1.59999e-06
k__Bacteria;p__Firmicutes;c__Bacilli;o__Lactobacillales;f__Carnobacteriaceae;g__Desemzia	0	0	0	0	6.26025e-05	0	1.04338e-05	0	0
k__Bacteria;p__Actinobacteria;c__Actinobacteria;o__Actinomycetales;f__Dermabacteraceae;g__Brachybacterium	0	0	0	8.20021e-06	3.96016e-05	1.21999e-05	1.00003e-05	0	0
k__Bacteria;p__Proteobacteria;c__Betaproteobacteria;o__Burkholderiales;f__Alcaligenaceae;g__Achromobacter	0	4.40001e-06	0	5.24014e-05	0	1.59999e-06	9.73356e-06	0	0
k__Bacteria;p__Actinobacteria;c__Actinobacteria;o__Actinomycetales;f__Brevibacteriaceae;g__Brevibacterium	2.79999e-06	1.6e-06	0	0	1.92008e-05	3.47998e-05	9.73343e-06	0	0
k__Bacteria;p__Proteobacteria;c__Alphaproteobacteria;o__Sphingomonadales;f__Sphingomonadaceae;g__Sphingomonas	0	4.40001e-06	3.00005e-06	2.76007e-05	1.14005e-05	1.05999e-05	9.50019e-06	0	1.59999e-06
k__Bacteria;p__Proteobacteria;c__Gammaproteobacteria;o__Pasteurellales;f__Pasteurellaceae;g__Haemophilus	0	0	3.30005e-05	1.32003e-05	8.00032e-06	0	9.03353e-06	0	0
k__Bacteria;p__Proteobacteria;c__Alphaproteobacteria;o__Rhizobiales;f__Methylobacteriaceae;g__Methylobacterium	1.4e-06	1.6e-06	0	4.10011e-05	0	9.19994e-06	8.86683e-06	0	0
k__Bacteria;p__Bacteroidetes;c__Bacteroidia;o__Bacteroidales;f__Porphyromonadaceae;g__Dysgonomonas	0	0	0	2.60007e-05	2.6001e-05	0	8.66695e-06	0	0
k__Bacteria;p__Actinobacteria;c__Coriobacteriia;o__Coriobacteriales;f__Coriobacteriaceae;g__Collinsella	0	0	1.40002e-06	6.40017e-06	3.66015e-05	7.59995e-06	8.66693e-06	0	3.91997e-05
k__Bacteria;p__Proteobacteria;c__Alphaproteobacteria;o__Rhizobiales;Other;Other	0	0	0	5.18013e-05	0	0	8.63356e-06	0	0
k__Bacteria;p__Firmicutes;c__Clostridia;o__Clostridiales;f__Lachnospiraceae;g__Epulopiscium	0	0	0	0	1.80007e-06	4.97997e-05	8.59996e-06	0	0
k__Bacteria;p__Firmicutes;c__Bacilli;o__Lactobacillales;f__Aerococcaceae;g__Facklamia	4.39999e-06	3.00001e-06	0	1.02003e-05	1.88008e-05	1.47999e-05	8.53349e-06	0	0
k__Bacteria;p__Firmicutes;c__Clostridia;o__Clostridiales;f__EtOH8;g__	0	0	5.80009e-06	1.50004e-05	4.40018e-06	2.41999e-05	8.23342e-06	2.99986e-06	1.49999e-05
k__Bacteria;p__Proteobacteria;c__Alphaproteobacteria;o__Rhizobiales;f__Methylobacteriaceae;g__	0	0	1.18002e-05	2.72007e-05	3.00012e-06	6.19996e-06	8.03349e-06	0	0
k__Bacteria;p__Firmicutes;c__Bacilli;o__Lactobacillales;Other;Other	0	0	0	0	3.60014e-06	4.23997e-05	7.66665e-06	0	0
k__Bacteria;p__Proteobacteria;c__Betaproteobacteria;o__Burkholderiales;f__Burkholderiaceae;g__Burkholderia	1.4e-06	0	1.36002e-05	2.38006e-05	0	2.99998e-06	6.9668e-06	0	0
k__Bacteria;p__Bacteroidetes;c__Flavobacteriia;o__Flavobacteriales;f__[Weeksellaceae];g__Chryseobacterium	0	0	0	1.42004e-05	1.46006e-05	1.19999e-05	6.80015e-06	0	0
k__Bacteria;p__Firmicutes;c__Clostridia;o__Clostridiales;f__Ruminococcaceae;Other	0	7.40002e-06	6.8001e-06	0	3.40014e-06	2.27999e-05	6.73335e-06	4.3998e-05	0.000127199
k__Bacteria;p__Firmicutes;c__Clostridia;o__;f__;g__	0	0	0	4.40011e-06	2.02008e-05	1.51999e-05	6.63347e-06	3.75983e-05	4.27997e-05
k__Bacteria;p__Proteobacteria;c__Alphaproteobacteria;o__Rhodospirillales;f__Acetobacteraceae;g__	0	1.6e-06	0	3.34009e-05	0	0	5.83348e-06	0	0
k__Bacteria;p__Proteobacteria;c__Gammaproteobacteria;o__Xanthomonadales;f__Xanthomonadaceae;Other	0	0	3.22005e-05	0	1.40006e-06	0	5.60009e-06	0	0
k__Bacteria;p__Proteobacteria;c__Betaproteobacteria;o__Burkholderiales;f__Oxalobacteraceae;Other	1.36e-05	6.00002e-06	1.18002e-05	1.60004e-06	0	0	5.50004e-06	0	0
k__Bacteria;p__Firmicutes;c__Clostridia;o__Clostridiales;f__Veillonellaceae;g__Acidaminococcus	0	0	0	0	0	3.21998e-05	5.36663e-06	0	0
k__Bacteria;p__Firmicutes;c__Clostridia;o__Clostridiales;f__[Mogibacteriaceae];g__Anaerovorax	0	0	5.80009e-06	9.00023e-06	1.36005e-05	1.59999e-06	5.00014e-06	1.19994e-05	5.33996e-05
k__Bacteria;p__Actinobacteria;c__Actinobacteria;o__Actinomycetales;f__Pseudonocardiaceae;g__Saccharopolyspora	2.79999e-06	0	3.80006e-06	2.04005e-05	1.40006e-06	1.59999e-06	5.0001e-06	0	0
k__Bacteria;p__Proteobacteria;c__Betaproteobacteria;o__Rhodocyclales;f__Rhodocyclaceae;Other	5.79999e-06	0	1.80003e-06	2.06005e-05	0	1.59999e-06	4.96676e-06	0	1.59999e-06
k__Bacteria;p__Firmicutes;c__Clostridia;o__Clostridiales;f__Syntrophomonadaceae;g__Syntrophomonas	0	0	0	0	9.40038e-06	1.95999e-05	4.83338e-06	4.05981e-05	3.07998e-05
k__Bacteria;p__Proteobacteria;c__Gammaproteobacteria;o__Xanthomonadales;f__Xanthomonadaceae;g__Luteibacter	0	0	0	2.54007e-05	0	2.99998e-06	4.73344e-06	0	0
k__Bacteria;p__[Thermi];c__Deinococci;o__Thermales;f__Thermaceae;g__Thermus	1.4e-06	0	4.40007e-06	0	1.04004e-05	1.19999e-05	4.70007e-06	0	0
k__Bacteria;p__Firmicutes;c__Clostridia;o__Clostridiales;f__Eubacteriaceae;g__Pseudoramibacter_Eubacterium	0	0	1.28002e-05	1.46004e-05	0	0	4.56676e-06	0	0
k__Bacteria;p__Proteobacteria;c__Gammaproteobacteria;o__Xanthomonadales;f__Xanthomonadaceae;g__Xanthomonas	0	0	1.40002e-06	2.02005e-05	0	4.59997e-06	4.36675e-06	0	0
k__Bacteria;p__Actinobacteria;c__Actinobacteria;o__Actinomycetales;f__Micrococcaceae;g__Kocuria	0	0	0	9.00023e-06	7.4003e-06	8.99995e-06	4.23341e-06	0	0
k__Bacteria;p__Firmicutes;c__Clostridia;o__Clostridiales;f__Veillonellaceae;g__Dialister	6.99999e-06	0	3.80006e-06	0	0	1.45999e-05	4.23333e-06	0	0
k__Bacteria;p__Proteobacteria;c__Gammaproteobacteria;o__Pseudomonadales;f__Moraxellaceae;g__Enhydrobacter	1.4e-06	0	0	4.40011e-06	1.62006e-05	2.99998e-06	4.16679e-06	0	0
k__Bacteria;p__Bacteroidetes;c__Sphingobacteriia;o__Sphingobacteriales;f__Sphingobacteriaceae;g__Sphingobacterium	0	3.00001e-06	0	2.06005e-05	0	0	3.93342e-06	0	0
k__Bacteria;p__Proteobacteria;c__Gammaproteobacteria;o__Pasteurellales;f__Pasteurellaceae;g__	0	0	0	1.78005e-05	1.80007e-06	2.99998e-06	3.76675e-06	0	0
k__Bacteria;p__Actinobacteria;c__Actinobacteria;o__Actinomycetales;f__Mycobacteriaceae;g__Mycobacterium	0	0	4.40007e-06	8.20021e-06	3.20013e-06	5.99996e-06	3.6334e-06	0	0
k__Bacteria;p__Firmicutes;c__Bacilli;o__Bacillales;f__Planococcaceae;Other	0	0	1.02002e-05	1.04003e-05	0	0	3.4334e-06	0	0
k__Bacteria;p__Proteobacteria;c__Alphaproteobacteria;o__Rhizobiales;f__Aurantimonadaceae;g__	0	0	0	1.54004e-05	2.00008e-06	2.99998e-06	3.40008e-06	0	0
k__Bacteria;p__Firmicutes;c__Bacilli;o__Bacillales;f__;g__	0	0	1.40002e-06	4.20011e-06	6.00024e-06	7.59995e-06	3.20005e-06	0	0
k__Bacteria;p__Firmicutes;c__Bacilli;o__Lactobacillales;f__Aerococcaceae;Other	2.79999e-06	7.20002e-06	0	4.80012e-06	4.00016e-06	0	3.13338e-06	0	0
k__Bacteria;p__Firmicutes;c__Clostridia;o__Clostridiales;f__Lachnospiraceae;g__Clostridium	0	0	1.20002e-05	0	5.0002e-06	0	2.8334e-06	0	0
k__Bacteria;p__Actinobacteria;c__Actinobacteria;o__Actinomycetales;f__Microbacteriaceae;g__	0	0	0	2.00005e-06	1.40006e-06	1.31999e-05	2.76667e-06	0	0
k__Bacteria;p__Actinobacteria;c__Actinobacteria;o__Actinomycetales;f__Gordoniaceae;g__Gordonia	0	0	5.20008e-06	1.60004e-06	4.40018e-06	4.59997e-06	2.63338e-06	0	0
k__Bacteria;p__Acidobacteria;c__[Chloracidobacteria];o__RB41;f__;g__	0	0	0	0	0	1.31999e-05	2.19999e-06	0	0
k__Bacteria;p__Bacteroidetes;c__Sphingobacteriia;o__Sphingobacteriales;f__Sphingobacteriaceae;g__	0	0	0	6.40017e-06	6.00024e-06	0	2.06673e-06	0	0
k__Bacteria;p__Firmicutes;c__Clostridia;o__Clostridiales;f__Peptococcaceae;g__	0	0	0	0	1.40006e-06	1.05999e-05	2e-06	1.35994e-05	2.59998e-05
k__Bacteria;p__Proteobacteria;c__Betaproteobacteria;o__Burkholderiales;f__Alcaligenaceae;g__	0	0	8.80013e-06	0	3.00012e-06	0	1.96671e-06	0	0
k__Bacteria;p__Proteobacteria;c__Gammaproteobacteria;o__Xanthomonadales;f__Sinobacteraceae;g__	0	0	0	5.80015e-06	5.60022e-06	0	1.90006e-06	0	0
k__Bacteria;p__Actinobacteria;c__Actinobacteria;o__Actinomycetales;f__Nocardiaceae;Other	0	0	0	1.14003e-05	0	0	1.90005e-06	0	0
k__Bacteria;p__Fusobacteria;c__Fusobacteriia;o__Fusobacteriales;f__Leptotrichiaceae;g__Leptotrichia	0	0	0	1.14003e-05	0	0	1.90005e-06	0	0
k__Bacteria;p__Proteobacteria;c__Betaproteobacteria;o__Burkholderiales;f__Oxalobacteraceae;g__	0	0	9.60015e-06	0	1.80007e-06	0	1.90004e-06	0	0
k__Bacteria;p__Actinobacteria;c__Actinobacteria;o__Actinomycetales;f__Microbacteriaceae;g__Pseudoclavibacter	0	0	0	0	1.04004e-05	0	1.7334e-06	0	0
k__Bacteria;p__Firmicutes;c__Bacilli;o__Bacillales;f__Bacillaceae;g__Oceanobacillus	0	0	0	0	8.80035e-06	1.39999e-06	1.70006e-06	0	0
k__Bacteria;p__Proteobacteria;c__Alphaproteobacteria;o__Rhizobiales;f__;g__	0	0	3.00005e-06	3.40009e-06	3.80015e-06	0	1.70005e-06	0	0
k__Bacteria;p__Chloroflexi;c__Thermomicrobia;o__JG30-KF-CM45;f__;g__	0	0	9.60015e-06	0	0	0	1.60002e-06	0	0
k__Bacteria;p__Actinobacteria;c__Actinobacteria;o__Actinomycetales;f__;g__	0	0	0	0	2.00008e-06	7.59995e-06	1.60001e-06	0	0
k__Bacteria;p__Firmicutes;c__Erysipelotrichi;o__Erysipelotrichales;f__Erysipelotrichaceae;g__p-75-a5	0	0	0	0	1.80007e-06	7.59995e-06	1.56667e-06	0	0.000166199
k__Bacteria;p__[Thermi];c__Deinococci;o__Deinococcales;f__Trueperaceae;g__Truepera	8.59998e-06	0	0	0	0	0	1.43333e-06	0	0
k__Bacteria;p__Actinobacteria;c__Actinobacteria;o__Bifidobacteriales;f__Bifidobacteriaceae;g__	0	0	0	6.40017e-06	2.00008e-06	0	1.40004e-06	0	0
k__Bacteria;p__Proteobacteria;c__Deltaproteobacteria;o__Myxococcales;f__;g__	0	0	0	0	8.00032e-06	0	1.33339e-06	0	0
k__Bacteria;p__Firmicutes;c__Bacilli;o__Lactobacillales;f__Leuconostocaceae;g__Leuconostoc	0	0	7.80012e-06	0	0	0	1.30002e-06	0	0
k__Bacteria;p__Actinobacteria;c__Actinobacteria;o__Actinomycetales;Other;Other	0	3.00001e-06	0	0	4.60018e-06	0	1.2667e-06	0	0
k__Bacteria;p__Actinobacteria;c__Actinobacteria;o__Actinomycetales;f__Actinomycetaceae;g__	1.4e-06	0	0	4.40011e-06	1.80007e-06	0	1.2667e-06	0	0
k__Archaea;p__Euryarchaeota;c__Halobacteria;o__Halobacteriales;f__Halobacteriaceae;g__Halorubrum	0	0	0	4.20011e-06	3.20013e-06	0	1.23337e-06	0	0
k__Bacteria;p__Proteobacteria;c__Gammaproteobacteria;o__Aeromonadales;f__Aeromonadaceae;g__	2.4e-06	0	0	0	3.20013e-06	1.59999e-06	1.20002e-06	0	0
k__Bacteria;p__Firmicutes;c__Bacilli;o__Bacillales;f__Bacillaceae;g__Natronobacillus	0	0	0	0	3.80015e-06	3.19998e-06	1.16669e-06	0	0
k__Bacteria;p__Actinobacteria;c__Actinobacteria;o__Actinomycetales;f__Streptomycetaceae;g__Streptomyces	0	0	0	6.40017e-06	0	0	1.06669e-06	0	0
k__Bacteria;p__Actinobacteria;c__Actinobacteria;o__Actinomycetales;f__Intrasporangiaceae;g__	0	0	2.00003e-06	0	0	4.39997e-06	1.06667e-06	0	0
k__Bacteria;p__Firmicutes;c__Bacilli;o__Bacillales;f__Paenibacillaceae;g__Aneurinibacillus	0	0	0	6.20016e-06	0	0	1.03336e-06	0	0
k__Bacteria;p__Firmicutes;c__Clostridia;o__Clostridiales;f__Clostridiaceae;g__Caloramator	0	0	0	6.20016e-06	0	0	1.03336e-06	0	0
k__Bacteria;p__Proteobacteria;c__Alphaproteobacteria;o__Rhizobiales;f__Hyphomicrobiaceae;g__Rhodoplanes	0	0	0	6.20016e-06	0	0	1.03336e-06	0	0
k__Bacteria;p__Proteobacteria;c__Alphaproteobacteria;o__Caulobacterales;f__Caulobacteraceae;g__Phenylobacterium	0	0	0	6.00015e-06	0	0	1.00003e-06	0	0
k__Bacteria;p__Proteobacteria;c__Betaproteobacteria;o__Burkholderiales;f__Comamonadaceae;g__Tepidimonas	0	0	0	6.00015e-06	0	0	1.00003e-06	0	0
k__Bacteria;p__[Thermi];c__Deinococci;o__Deinococcales;f__Deinococcaceae;g__CM44	2.79999e-06	0	0	3.20008e-06	0	0	1.00001e-06	0	0
k__Bacteria;p__Firmicutes;c__Clostridia;o__Clostridiales;f__[Tissierellaceae];g__Anaerococcus	0	0	0	5.80015e-06	0	0	9.66692e-07	0	0
k__Bacteria;p__Firmicutes;c__Clostridia;o__Clostridiales;f__Lachnospiraceae;g__Lachnobacterium	5.79999e-06	0	0	0	0	0	9.66665e-07	0	0
k__Bacteria;p__Bacteroidetes;c__Cytophagia;o__Cytophagales;f__Cytophagaceae;g__Flectobacillus	0	0	0	0	5.60022e-06	0	9.33371e-07	0	0
k__Bacteria;p__Proteobacteria;c__Gammaproteobacteria;o__Enterobacteriales;f__Enterobacteriaceae;g__Morganella	0	0	0	0	5.60022e-06	0	9.33371e-07	0	0
k__Bacteria;p__Proteobacteria;c__Betaproteobacteria;o__Burkholderiales;f__;g__	0	0	0	4.80012e-06	0	0	8.00021e-07	0	0
k__Bacteria;p__Firmicutes;c__Clostridia;o__Clostridiales;f__Christensenellaceae;Other	0	0	1.80003e-06	0	0	2.99998e-06	8.00002e-07	0.000317385	2.69998e-05
k__Bacteria;p__Bacteroidetes;c__Flavobacteriia;o__Flavobacteriales;f__Flavobacteriaceae;g__Myroides	0	0	0	0	0	4.39997e-06	7.33329e-07	0	0
k__Bacteria;p__Actinobacteria;c__Coriobacteriia;o__Coriobacteriales;f__Coriobacteriaceae;Other	0	0	0	0	0	1.59999e-06	2.66665e-07	0	1.65999e-05
k__Bacteria;p__Proteobacteria;c__Epsilonproteobacteria;o__Campylobacterales;f__Helicobacteraceae;Other	0	0	0	0	0	0	0	0.000131194	0
k__Bacteria;p__Firmicutes;c__Clostridia;o__Clostridiales;f__Gracilibacteraceae;g__Gracilibacter	0	0	0	0	0	0	0	1.49993e-05	0
